# Supplementary material for: Gene Expression Profile Analysis of Type 2 Diabetic Mouse Liver
Source: PLoS One. 2013 Mar 1;8(3):e57766. doi: 10.1371/journal.pone.0057766 (PMC3585940; doi:10.1371/journal.pone.0057766)
Supplement: Table S2 — Gene expression profile of immune-related 15 pathways in KEGG database in diabetic (DB) mouse liver compared with normal (N) control. (XLS) [file pone.0057766.s003.xls]

## Sheet: Sheet1
Table S2. Gene expression profile of immune-related 15 pathways in KEGG database in diabetic (DB) mouse liver compared with normal (N) control.
EntrezID	Gene	N_TPM	DB_TPM	Log2 Ratio(DB/N)	FDR	Gene Description
Hematopoietic cell lineage [PATH:mmu04640]
12491	Cd36	12.06	213.43	4.14546	<0.001	Cd36|CD36 antigen
12479	Cd1d1	103.32	455.13	2.13916	<0.001	Cd1d1|CD1d1 antigen
14969	H2-Eb1	22.67	43.9	0.953437	<0.001	H2-Eb1|histocompatibility 2, class II antigen E beta
21673	Dntt	1.95	8.96	2.20002	<0.001	Dntt|deoxynucleotidyltransferase, terminal
13136	Cd55	8.85	16.43	0.892583	<0.001	Cd55|CD55 antigen
12490	Cd34	0.58	2.67	2.20271	<0.001	Cd34|CD34 antigen
12494	Cd38	11.97	17.62	0.557791	≥0.001	Cd38|CD38 antigen
16175	Il1a	0.78	2.44	1.64534	≥0.001	Il1a|interleukin 1 alpha
12982	Csf2ra	27.14	34.35	0.339889	≥0.001	Csf2ra|colony stimulating factor 2 receptor, alpha, low-affinity (granulocyte-macrophage)
12977	Csf1	1.65	3.33	1.01306	≥0.001	Csf1|colony stimulating factor 1 (macrophage)
12516	Cd7	0.01	0.59	5.88264	≥0.001	Cd7|CD7 antigen
12484	Cd24a	1.65	2.89	0.808603	≥0.001	Cd24a|CD24a antigen
22042	Tfrc	12.84	15.84	0.302927	≥0.001	Tfrc|transferrin receptor
14255	Flt3	0.01	0.37	5.20945	≥0.001	Flt3|FMS-like tyrosine kinase 3
12502	Cd3g	0.01	0.37	5.20945	≥0.001	Cd3g|CD3 antigen, gamma polypeptide
16590	Kit	4.38	5.92	0.434666	≥0.001	Kit|kit oncogene
12478	Cd19	0.68	1.33	0.96782	≥0.001	Cd19|CD19 antigen
16400	Itga3	0.88	1.33	0.595851	≥0.001	Itga3|integrin alpha 3
13857	Epor	0.78	1.18	0.597241	≥0.001	Epor|erythropoietin receptor
12475	Cd14	2.63	2.89	0.136007	≥0.001	Cd14|CD14 antigen
16416	Itgb3	0.58	0.67	0.208108	≥0.001	Itgb3|integrin beta 3
16399	Itga2b	0.88	0.96	0.125531	≥0.001	Itga2b|integrin alpha 2b
13137	Daf2	0.68	0.74	0.121991	≥0.001	Daf2|decay accelerating factor 2
17311	Kitl	1.17	1.18	0.0122783	≥0.001	Kitl|kit ligand
16178	Il1r2	0.19	0.15	-0.341037	≥0.001	Il1r2|interleukin 1 receptor, type II
16196	Il7	0.58	0.44	-0.398549	≥0.001	Il7|interleukin 7
12527	Cd9	13.62	12.58	-0.114595	≥0.001	Cd9|CD9 antigen
12500	Cd3d	1.95	1.55	-0.331206	≥0.001	Cd3d|CD3 antigen, delta polypeptide
12501	Cd3e	0.39	0.15	-1.37851	≥0.001	Cd3e|CD3 antigen, epsilon polypeptide
12493	Cd37	1.95	1.26	-0.63005	≥0.001	Cd37|CD37 antigen
12480	Cd1d2	0.19	0.01	-4.24793	≥0.001	Cd1d2|CD1d2 antigen
16190	Il4ra	1.17	0.59	-0.987722	≥0.001	Il4ra|interleukin 4 receptor, alpha
12509	Cd59a	60.71	55.89	-0.119344	≥0.001	Cd59a|CD59a antigen
17380	Mme	1.65	0.89	-0.890589	≥0.001	Mme|membrane metallo endopeptidase
16188	Il3ra	0.68	0.22	-1.62803	≥0.001	Il3ra|interleukin 3 receptor, alpha chain
12505	Cd44	2.82	1.48	-0.930098	≥0.001	Cd44|CD44 antigen
16192	Il5ra	1.46	0.52	-1.48938	≥0.001	Il5ra|interleukin 5 receptor, alpha
12481	Cd2	0.49	0.01	-5.61471	≥0.001	Cd2|CD2 antigen
16402	Itga5	10.41	7.25	-0.521917	≥0.001	Itga5|integrin alpha 5 (fibronectin receptor alpha)
21832	Thpo	22.28	17.25	-0.369153	≥0.001	Thpo|thrombopoietin
16790	Anpep	48.16	40.27	-0.25813	≥0.001	Anpep|alanyl (membrane) aminopeptidase
16409	Itgam	1.07	0.15	-2.83458	≥0.001	Itgam|integrin alpha M
12504	Cd4	1.46	0.3	-2.28293	≥0.001	Cd4|CD4 antigen
16176	Il1b	3.21	0.81	-1.98658	<0.001	Il1b|interleukin 1 beta
16401	Itga4	4.67	1.41	-1.72773	<0.001	Itga4|integrin alpha 4
14129	Fcgr1	2.72	0.22	-3.62803	<0.001	Fcgr1|Fc receptor, IgG, high affinity I
12978	Csf1r	21.7	10.14	-1.09764	<0.001	Csf1r|colony stimulating factor 1 receptor
16177	Il1r1	181.06	50.41	-1.84469	<0.001	Il1r1|interleukin 1 receptor, type I
EntrezID	Gene	N_TPM	DB_TPM	Log2 Ratio(DB/N)	FDR	Gene Description
Complement and coagulation cascades [PATH:mmu04610]
11905	Serpinc1	1312.44	2328.88	0.827385	<0.001	Serpinc1|serine (or cysteine) peptidase inhibitor, clade C (antithrombin), member 1
12266	C3	1569	2416.08	0.622823	<0.001	C3|complement component 3
15160	Serpind1	175.41	308.4	0.814072	<0.001	Serpind1|serine (or cysteine) peptidase inhibitor, clade D, member 1
69379	C8g	1215.35	1464.14	0.268682	<0.001	C8g|complement component 8, gamma polypeptide
14061	F2	1540.1	1808.45	0.23173	<0.001	F2|coagulation factor II
11537	Cfd	0.49	11.84	4.59474	<0.001	Cfd|complement factor D (adipsin)
14071	F9	58.96	101.64	0.78566	<0.001	F9|coagulation factor IX
12269	C4bp	317.75	396.28	0.318628	<0.001	C4bp|complement component 4 binding protein
12946	Cr1l	16.54	34.65	1.0669	<0.001	Cr1l|complement component (3b/4b) receptor 1-like
14060	F13b	300.63	353.19	0.232456	<0.001	F13b|coagulation factor XIII, beta subunit
12260	C1qb	38.14	57.82	0.600264	<0.001	C1qb|complement component 1, q subcomponent, beta polypeptide
58992	F12	178.62	217.94	0.287037	<0.001	F12|coagulation factor XII (Hageman factor)
18787	Serpine1	0.01	1.26	6.97728	<0.001	Serpine1|serine (or cysteine) peptidase inhibitor, clade E, member 1
56373	Cpb2	318.72	362.67	0.186368	<0.001	Cpb2|carboxypeptidase B2 (plasma)
13136	Cd55	8.85	16.43	0.892583	<0.001	Cd55|CD55 antigen
17175	Masp2	105.75	128.96	0.286266	<0.001	Masp2|mannan-binding lectin serine peptidase 2
14068	F7	35.32	48.56	0.459283	<0.001	F7|coagulation factor VII
74145	F13a1	0.01	0.81	6.33985	≥0.001	F13a1|coagulation factor XIII, A1 subunit
19128	Pros1	68.3	77.8	0.187885	≥0.001	Pros1|protein S (alpha)
12628	Cfh	142.72	155.9	0.127433	≥0.001	Cfh|complement component factor h
268591	Serpina5	0.01	0.44	5.45943	≥0.001	Serpina5|serine (or cysteine) peptidase inhibitor, clade A, member 5
17194	Mbl1	97.48	105.12	0.108859	≥0.001	Mbl1|mannose-binding lectin (protein A) 1
14058	F10	238.07	248.96	0.0645281	≥0.001	F10|coagulation factor X
17195	Mbl2	195.75	200.25	0.0327899	≥0.001	Mbl2|mannose-binding lectin (protein C) 2
12267	C3ar1	0.68	0.89	0.388271	≥0.001	C3ar1|complement component 3a receptor 1
13137	Daf2	0.68	0.74	0.121991	≥0.001	Daf2|decay accelerating factor 2
21824	Thbd	0.39	0.37	-0.0759489	≥0.001	Thbd|thrombomodulin
12279	C9	172.69	171.67	-0.0085466	≥0.001	C9|complement component 9
16621	Klkb1	3.21	2.96	-0.116976	≥0.001	Klkb1|kallikrein B, plasma 1
18793	Plaur	0.29	0.22	-0.398549	≥0.001	Plaur|plasminogen activator, urokinase receptor
18791	Plat	0.39	0.3	-0.378512	≥0.001	Plat|plasminogen activator, tissue
14066	F3	1.46	0.96	-0.604862	≥0.001	F3|coagulation factor III
17174	Masp1	0.39	0.15	-1.37851	≥0.001	Masp1|mannan-binding lectin serine peptidase 1
18792	Plau	2.82	2	-0.495695	≥0.001	Plau|plasminogen activator, urokinase
22371	Vwf	1.95	1.26	-0.63005	≥0.001	Vwf|Von Willebrand factor homolog
12509	Cd59a	60.71	55.89	-0.119344	≥0.001	Cd59a|CD59a antigen
17221	Cd46	0.29	0.01	-4.85798	≥0.001	Cd46|CD46 antigen, complement regulatory protein
21788	Tfpi	5.25	3.55	-0.564498	≥0.001	Tfpi|tissue factor pathway inhibitor
14062	F2r	20.33	16.66	-0.287222	≥0.001	F2r|coagulation factor II (thrombin) receptor
50909	C1ra	4.86	2.89	-0.749887	≥0.001	C1r|complement component 1, r subcomponent
14069	F8	8.95	5.11	-0.808564	≥0.001	F8|coagulation factor VIII
12263	C2	48.74	38.27	-0.348892	<0.001	C2|complement component 2 (within H-2S)
385643	Kng2	21.21	10.59	-1.00204	<0.001	Kng2|kininogen 2
19123	Proc	93.59	68.25	-0.455525	<0.001	Proc|protein C
12262	C1qc	11.09	3.18	-1.80216	<0.001	C1qc|complement component 1, q subcomponent, C chain
15139	Hc	227.85	169.82	-0.424078	<0.001	Hc|hemolytic complement
14161	Fga	30.16	11.03	-1.4512	<0.001	Fga|fibrinogen, alpha polypeptide
16644	Kng1	787.27	667.15	-0.238847	<0.001	Kng1|kininogen 1
12258	Serping1	123.66	77.95	-0.665758	<0.001	Serping1|serine (or cysteine) peptidase inhibitor, clade G, member 1
109821	F11	81.04	35.9	-1.17465	<0.001	F11|coagulation factor XI
14962	Cfb	505.23	309	-0.709333	<0.001	Cfb|complement factor B
110382	C8b	144.67	50.86	-1.50816	<0.001	C8b|complement component 8, beta polypeptide
18815	Plg	463.78	250.37	-0.889379	<0.001	Plg|plasminogen
12259	C1qa	176.48	50.71	-1.79916	<0.001	C1qa|complement component 1, q subcomponent, alpha polypeptide
230558	C8a	264.34	97.79	-1.43464	<0.001	C8a|complement component 8, alpha polypeptide
18816	Serpinf2	332.05	137.92	-1.26757	<0.001	Serpinf2|serine (or cysteine) peptidase inhibitor, clade F, member 2
12274	C6	172.98	36.64	-2.23911	<0.001	C6|complement component 6
110135	Fgb	2534.41	1462.66	-0.793055	<0.001	Fgb|fibrinogen, B beta polypeptide
99571	Fgg	5078.64	1837.1	-1.46701	<0.001	Fgg|fibrinogen, gamma polypeptide
EntrezID	Gene	N_TPM	DB_TPM	Log2 Ratio(DB/N)	FDR	Gene Description
Toll-like receptor signaling pathway [PATH:mmu04620]
26397	Map2k3	21.6	59.45	1.46065	<0.001	Map2k3|mitogen-activated protein kinase kinase 3
12675	Chuk	28.7	63.96	1.15612	<0.001	Chuk|conserved helix-loop-helix ubiquitous kinase
20750	Spp1	57.21	103.12	0.849985	<0.001	Spp1|secreted phosphoprotein 1
54131	Irf3	41.35	76.84	0.89397	<0.001	Irf3|interferon regulatory factor 3
26417	Mapk3	19.46	37.24	0.936341	<0.001	Mapk3|mitogen-activated protein kinase 3
15976	Ifnar2	77.25	109.49	0.503192	<0.001	Ifnar2|interferon (alpha and beta) receptor 2
26395	Map2k1	11.58	23.91	1.04598	<0.001	Map2k1|mitogen-activated protein kinase kinase 1
26400	Map2k7	0.01	1.55	7.27612	<0.001	Map2k7|mitogen-activated protein kinase kinase 7
26396	Map2k2	7.3	13.77	0.91556	<0.001	Map2k2|mitogen-activated protein kinase kinase 2
26420	Mapk9	19.85	29.46	0.569618	<0.001	Mapk9|mitogen-activated protein kinase 9
18035	Nfkbia	1.85	5.18	1.48543	<0.001	Nfkbia|nuclear factor of kappa light polypeptide gene enhancer in B-cells inhibitor, alpha
16151	Ikbkg	7.98	13.4	0.747772	<0.001	Ikbkg|inhibitor of kappaB kinase gamma
17874	Myd88	8.95	14.44	0.690111	<0.001	Myd88|myeloid differentiation primary response gene 88
16179	Irak1	4.18	7.62	0.866288	≥0.001	Irak1|interleukin-1 receptor-associated kinase 1
26413	Mapk1	12.65	18.06	0.513661	≥0.001	Mapk1|mitogen-activated protein kinase 1
26399	Map2k6	1.07	2.89	1.43346	≥0.001	Map2k6|mitogen-activated protein kinase kinase 6
266632	Irak4	2.33	4.52	0.955993	≥0.001	Irak4|interleukin-1 receptor-associated kinase 4
22031	Traf3	3.02	5.26	0.800514	≥0.001	Traf3|TNF receptor-associated factor 3
53791	Tlr5	1.46	3.11	1.09095	≥0.001	Tlr5|toll-like receptor 5
54473	Tollip	16.73	21.25	0.345025	≥0.001	Tollip|toll interacting protein
16476	Jun	5.84	8.22	0.49317	≥0.001	Jun|Jun oncogene
56489	Ikbke	12.94	16.36	0.338335	≥0.001	Ikbke|inhibitor of kappaB kinase epsilon
26416	Mapk14	11.38	14.58	0.35749	≥0.001	Mapk14|mitogen-activated protein kinase 14
16160	Il12b	10.41	13.47	0.37178	≥0.001	Il12b|interleukin 12b
117149	Tirap	1.75	3.11	0.82956	≥0.001	Tirap|toll-interleukin 1 receptor (TIR) domain-containing adaptor protein
12370	Casp8	1.65	2.96	0.843131	≥0.001	Casp8|caspase 8
17087	Ly96	5.25	7.33	0.481496	≥0.001	Ly96|lymphocyte antigen 96
68652	Map3k7ip2	12.55	15.47	0.301786	≥0.001	Map3k7ip2|mitogen-activated protein kinase kinase kinase 7 interacting protein 2
26409	Map3k7	4.18	5.92	0.502094	≥0.001	Map3k7|mitogen-activated protein kinase kinase kinase 7
20303	Ccl4	0.01	0.37	5.20945	≥0.001	Ccl4|chemokine (C-C motif) ligand 4
17329	Cxcl9	1.17	2.15	0.877828	≥0.001	Cxcl9|chemokine (C-X-C motif) ligand 9
26410	Map3k8	0.68	1.41	1.05209	≥0.001	Map3k8|mitogen-activated protein kinase kinase kinase 8
19766	Ripk1	0.88	1.55	0.816693	≥0.001	Ripk1|receptor (TNFRSF)-interacting serine-threonine kinase 1
24088	Tlr2	0.39	0.89	1.19033	≥0.001	Tlr2|toll-like receptor 2
74769	Pik3cb	6.23	7.77	0.318682	≥0.001	Pik3cb|phosphatidylinositol 3-kinase, catalytic, beta polypeptide
18710	Pik3r3	0.01	0.22	4.45943	≥0.001	Pik3r3|phosphatidylinositol 3 kinase, regulatory subunit, polypeptide 3 (p55)
20302	Ccl3	0.01	0.22	4.45943	≥0.001	Ccl3|chemokine (C-C motif) ligand 3
18706	Pik3ca	1.85	2.67	0.529314	≥0.001	Pik3ca|phosphatidylinositol 3-kinase, catalytic, alpha polypeptide
26398	Map2k4	8.95	10.59	0.242743	≥0.001	Map2k4|mitogen-activated protein kinase kinase 4
16803	Lbp	13.33	15.03	0.173168	≥0.001	Lbp|lipopolysaccharide binding protein
30955	Pik3cg	0.01	0.15	3.90689	≥0.001	Pik3cg|phosphoinositide-3-kinase, catalytic, gamma polypeptide
13038	Ctsk	0.39	0.67	0.780687	≥0.001	Ctsk|cathepsin K
23797	Akt3	0.39	0.67	0.780687	≥0.001	Akt3|thymoma viral proto-oncogene 3
106759	Ticam1	4.57	5.03	0.138364	≥0.001	Ticam1|toll-like receptor adaptor molecule 1
12475	Cd14	2.63	2.89	0.136007	≥0.001	Cd14|CD14 antigen
18709	Pik3r2	4.86	5.03	0.0496021	≥0.001	Pik3r2|phosphatidylinositol 3-kinase, regulatory subunit, polypeptide 2 (p85 beta)
22034	Traf6	6.32	6.29	-0.00686454	≥0.001	Traf6|TNF receptor-associated factor 6
20846	Stat1	0.19	0.15	-0.341037	≥0.001	Stat1|signal transducer and activator of transcription 1
20304	Ccl5	1.56	1.33	-0.23012	≥0.001	Ccl5|chemokine (C-C motif) ligand 5
19353	Rac1	110.23	108.16	-0.0273499	≥0.001	Rac1|RAS-related C3 botulinum substrate 1
170743	Tlr7	0.78	0.52	-0.584963	≥0.001	Tlr7|toll-like receptor 7
320207	Pik3r5	2.24	1.78	-0.331621	≥0.001	Pik3r5|phosphoinositide-3-kinase, regulatory subunit 5, p101
16150	Ikbkb	0.88	0.59	-0.576789	≥0.001	Ikbkb|inhibitor of kappaB kinase beta
18707	Pik3cd	1.85	1.18	-0.648738	≥0.001	Pik3cd|phosphatidylinositol 3-kinase catalytic delta polypeptide
14281	Fos	1.85	1.18	-0.648738	≥0.001	Fos|FBJ osteosarcoma oncogene
225471	Ticam2	0.19	0.01	-4.24793	≥0.001	Ticam2|toll-like receptor adaptor molecule 2
56480	Tbk1	10.41	8.59	-0.27724	≥0.001	Tbk1|TANK-binding kinase 1
14082	Fadd	1.26	0.59	-1.09464	≥0.001	Fadd|Fas (TNFRSF6)-associated via death domain
12524	Cd86	1.36	0.59	-1.20482	≥0.001	Cd86|CD86 antigen
26419	Mapk8	0.78	0.22	-1.82597	≥0.001	Mapk8|mitogen-activated protein kinase 8
66513	Map3k7ip1	0.97	0.3	-1.69302	≥0.001	Map3k7ip1|mitogen-activated protein kinase kinase kinase 7 interacting protein 1
18033	Nfkb1	13.91	10.07	-0.466059	≥0.001	Nfkb1|nuclear factor of kappa light polypeptide gene enhancer in B-cells 1, p105
21898	Tlr4	0.58	0.01	-5.85798	≥0.001	Tlr4|toll-like receptor 4
21939	Cd40	1.07	0.15	-2.83458	≥0.001	Cd40|CD40 antigen
26415	Mapk13	1.17	0.15	-2.96347	≥0.001	Mapk13|mitogen-activated protein kinase 13
142980	Tlr3	4.77	2.22	-1.10343	≥0.001	Tlr3|toll-like receptor 3
18708	Pik3r1	13.72	8.44	-0.700966	<0.001	Pik3r1|phosphatidylinositol 3-kinase, regulatory subunit, polypeptide 1 (p85 alpha)
19094	Mapk11	1.75	0.22	-2.99178	<0.001	Mapk11|mitogen-activated protein kinase 11
16176	Il1b	3.21	0.81	-1.98658	<0.001	Il1b|interleukin 1 beta
19697	Rela	21.89	14.14	-0.63049	<0.001	Rela|v-rel reticuloendotheliosis viral oncogene homolog A (avian)
27056	Irf5	7.98	3.33	-1.26087	<0.001	Irf5|interferon regulatory factor 5
29857	Mapk12	40.28	26.13	-0.624357	<0.001	Mapk12|mitogen-activated protein kinase 12
15975	Ifnar1	7.1	2	-1.82782	<0.001	Ifnar1|interferon (alpha and beta) receptor 1
54123	Irf7	30.55	10.36	-1.56015	<0.001	Irf7|interferon regulatory factor 7
EntrezID	Gene	N_TPM	DB_TPM	Log2 Ratio(DB/N)	FDR	Gene Description
NOD-like receptor signaling pathway [PATH:mmu04621]
12675	Chuk	28.7	63.96	1.15612	<0.001	Chuk|conserved helix-loop-helix ubiquitous kinase
26417	Mapk3	19.46	37.24	0.936341	<0.001	Mapk3|mitogen-activated protein kinase 3
59079	Erbb2ip	20.14	31.31	0.63656	<0.001	Erbb2ip|Erbb2 interacting protein
26420	Mapk9	19.85	29.46	0.569618	<0.001	Mapk9|mitogen-activated protein kinase 9
18035	Nfkbia	1.85	5.18	1.48543	<0.001	Nfkbia|nuclear factor of kappa light polypeptide gene enhancer in B-cells inhibitor, alpha
192656	Ripk2	0.88	3.33	1.91995	<0.001	Ripk2|receptor (TNFRSF)-interacting serine-threonine kinase 2
11796	Birc3	2.53	6	1.24583	<0.001	Birc3|baculoviral IAP repeat-containing 3
16151	Ikbkg	7.98	13.4	0.747772	<0.001	Ikbkg|inhibitor of kappaB kinase gamma
26413	Mapk1	12.65	18.06	0.513661	≥0.001	Mapk1|mitogen-activated protein kinase 1
22027	Hsp90b1	10.31	15.18	0.558127	≥0.001	Hsp90b1|heat shock protein 90, beta (Grp94), member 1
239319	Card6	3.21	5.85	0.865863	≥0.001	Card6|caspase recruitment domain family, member 6
16173	Il18	6.03	8.96	0.571341	≥0.001	Il18|interleukin 18
26416	Mapk14	11.38	14.58	0.35749	≥0.001	Mapk14|mitogen-activated protein kinase 14
11798	Xiap	13.04	16.36	0.327229	≥0.001	Xiap|X-linked inhibitor of apoptosis
12370	Casp8	1.65	2.96	0.843131	≥0.001	Casp8|caspase 8
68652	Map3k7ip2	12.55	15.47	0.301786	≥0.001	Map3k7ip2|mitogen-activated protein kinase kinase kinase 7 interacting protein 2
26409	Map3k7	4.18	5.92	0.502094	≥0.001	Map3k7|mitogen-activated protein kinase kinase kinase 7
637515	Nlrp1b	0.01	0.15	3.90689	≥0.001	Nlrp1b|NLR family, pyrin domain containing 1B
216799	Nlrp3	0.19	0.44	1.2115	≥0.001	Nlrp3|NLR family, pyrin domain containing 3
11797	Birc2	3.5	4.15	0.245756	≥0.001	Birc2|baculoviral IAP repeat-containing 2
21929	Tnfaip3	2.63	3.18	0.273964	≥0.001	Tnfaip3|tumor necrosis factor, alpha-induced protein 3
67955	Sugt1	0.19	0.22	0.211504	≥0.001	Sugt1|SGT1, suppressor of G2 allele of SKP1 (S. cerevisiae)
17952	Naip6	0.49	0.52	0.0857299	≥0.001	Birc1f|baculoviral IAP repeat-containing 1f
332579	Card9	0.29	0.3	0.0489096	≥0.001	Card9|caspase recruitment domain family, member 9
22034	Traf6	6.32	6.29	-0.00686454	≥0.001	Traf6|TNF receptor-associated factor 6
20304	Ccl5	1.56	1.33	-0.23012	≥0.001	Ccl5|chemokine (C-C motif) ligand 5
107607	Nod1	5.55	4.96	-0.162148	≥0.001	Nod1|nucleotide-binding oligomerization domain containing 1
54483	Mefv	0.29	0.15	-0.95109	≥0.001	Mefv|Mediterranean fever
16150	Ikbkb	0.88	0.59	-0.576789	≥0.001	Ikbkb|inhibitor of kappaB kinase beta
22051	Trip6	5.35	4.22	-0.342296	≥0.001	Trip6|thyroid hormone receptor interactor 6
20310	Cxcl2	0.19	0.01	-4.24793	≥0.001	Cxcl2|chemokine (C-X-C motif) ligand 2
257632	Nod2	0.29	0.01	-4.85798	≥0.001	Nod2|nucleotide-binding oligomerization domain containing 2
26419	Mapk8	0.78	0.22	-1.82597	≥0.001	Mapk8|mitogen-activated protein kinase 8
66513	Map3k7ip1	0.97	0.3	-1.69302	≥0.001	Map3k7ip1|mitogen-activated protein kinase kinase kinase 7 interacting protein 1
14825	Cxcl1	2.43	1.11	-1.1304	≥0.001	Cxcl1|chemokine (C-X-C motif) ligand 1
18033	Nfkb1	13.91	10.07	-0.466059	≥0.001	Nfkb1|nuclear factor of kappa light polypeptide gene enhancer in B-cells 1, p105
26415	Mapk13	1.17	0.15	-2.96347	≥0.001	Mapk13|mitogen-activated protein kinase 13
66724	Map3k7ip3	18.19	11.99	-0.601314	<0.001	Map3k7ip3|mitogen-activated protein kinase kinase kinase 7 interacting protein 3
19094	Mapk11	1.75	0.22	-2.99178	<0.001	Mapk11|mitogen-activated protein kinase 11
16176	Il1b	3.21	0.81	-1.98658	<0.001	Il1b|interleukin 1 beta
19697	Rela	21.89	14.14	-0.63049	<0.001	Rela|v-rel reticuloendotheliosis viral oncogene homolog A (avian)
29857	Mapk12	40.28	26.13	-0.624357	<0.001	Mapk12|mitogen-activated protein kinase 12
15519	Hsp90aa1	72.97	46.19	-0.659723	<0.001	Hsp90aa1|heat shock protein 90, alpha (cytosolic), class A member 1
15516	Hsp90ab1	534.41	298.19	-0.841715	<0.001	Hsp90ab1|heat shock protein 90 alpha (cytosolic), class B member 1
EntrezID	Gene	N_TPM	DB_TPM	Log2 Ratio(DB/N)	FDR	Gene Description
RIG-I-like receptor signaling pathway [PATH:mmu04622]
225913	Dak	226.78	397.76	0.810605	<0.001	Dak|dihydroxyacetone kinase 2 homolog (yeast)
12675	Chuk	28.7	63.96	1.15612	<0.001	Chuk|conserved helix-loop-helix ubiquitous kinase
67526	Atg12	13.13	35.46	1.43333	<0.001	Atg12|autophagy-related 12 (yeast)
54131	Irf3	41.35	76.84	0.89397	<0.001	Irf3|interferon regulatory factor 3
26900	Ddx3y	1.07	6.59	2.62267	<0.001	Ddx3y|DEAD (Asp-Glu-Ala-Asp) box polypeptide 3, Y-linked
11793	Atg5	60.81	82.1	0.433074	<0.001	Atg5|autophagy-related 5 (yeast)
27215	Azi2	7	13.62	0.9603	<0.001	Azi2|5-azacytidine induced gene 2
26420	Mapk9	19.85	29.46	0.569618	<0.001	Mapk9|mitogen-activated protein kinase 9
18035	Nfkbia	1.85	5.18	1.48543	<0.001	Nfkbia|nuclear factor of kappa light polypeptide gene enhancer in B-cells inhibitor, alpha
16151	Ikbkg	7.98	13.4	0.747772	<0.001	Ikbkg|inhibitor of kappaB kinase gamma
74256	Cyld	2.24	5.4	1.26946	<0.001	Cyld|cylindromatosis (turban tumor syndrome)
71609	Tradd	10.31	15.47	0.585429	≥0.001	Tradd|TNFRSF1A-associated via death domain
22031	Traf3	3.02	5.26	0.800514	≥0.001	Traf3|TNF receptor-associated factor 3
228607	Mavs	4.57	7.11	0.637655	≥0.001	D430028G21Rik|RIKEN cDNA D430028G21 gene
56489	Ikbke	12.94	16.36	0.338335	≥0.001	Ikbke|inhibitor of kappaB kinase epsilon
26416	Mapk14	11.38	14.58	0.35749	≥0.001	Mapk14|mitogen-activated protein kinase 14
16160	Il12b	10.41	13.47	0.37178	≥0.001	Il12b|interleukin 12b
12370	Casp8	1.65	2.96	0.843131	≥0.001	Casp8|caspase 8
26409	Map3k7	4.18	5.92	0.502094	≥0.001	Map3k7|mitogen-activated protein kinase kinase kinase 7
66641	Sike1	1.46	2.52	0.787455	≥0.001	5730470L24Rik|RIKEN cDNA 5730470L24 gene
19766	Ripk1	0.88	1.55	0.816693	≥0.001	Ripk1|receptor (TNFRSF)-interacting serine-threonine kinase 1
270151	Nlrx1	8.27	9.85	0.252236	≥0.001	Nlrx1|NLR family member X1
217069	Trim25	15.27	17.32	0.181739	≥0.001	Trim25|tripartite motif-containing 25
73174	Tbkbp1	5.45	5.85	0.10218	≥0.001	Tbkbp1|TBK1 binding protein 1
72512	Tmem173	1.46	1.63	0.158904	≥0.001	Tmem173|transmembrane protein 173
22034	Traf6	6.32	6.29	-0.00686454	≥0.001	Traf6|TNF receptor-associated factor 6
16150	Ikbkb	0.88	0.59	-0.576789	≥0.001	Ikbkb|inhibitor of kappaB kinase beta
26401	Map3k1	3.99	3.26	-0.291517	≥0.001	Map3k1|mitogen-activated protein kinase kinase kinase 1
67664	Rnf125	3.5	2.74	-0.353179	≥0.001	Rnf125|ring finger protein 125
56480	Tbk1	10.41	8.59	-0.27724	≥0.001	Tbk1|TANK-binding kinase 1
71586	Ifih1	4.67	3.41	-0.453651	≥0.001	Ifih1|interferon induced with helicase C domain 1
14082	Fadd	1.26	0.59	-1.09464	≥0.001	Fadd|Fas (TNFRSF6)-associated via death domain
26419	Mapk8	0.78	0.22	-1.82597	≥0.001	Mapk8|mitogen-activated protein kinase 8
54644	Otud5	25	20.28	-0.30187	≥0.001	Otud5|OTU domain containing 5
18033	Nfkb1	13.91	10.07	-0.466059	≥0.001	Nfkb1|nuclear factor of kappa light polypeptide gene enhancer in B-cells 1, p105
26415	Mapk13	1.17	0.15	-2.96347	≥0.001	Mapk13|mitogen-activated protein kinase 13
230073	Ddx58	4.57	2.07	-1.14256	≥0.001	Ddx58|DEAD (Asp-Glu-Ala-Asp) box polypeptide 58
21353	Tank	79.78	67.66	-0.237724	≥0.001	Tank|TRAF family member-associated Nf-kappa B activator
19094	Mapk11	1.75	0.22	-2.99178	<0.001	Mapk11|mitogen-activated protein kinase 11
80861	Dhx58	8.56	4.15	-1.0445	<0.001	Dhx58|DEXH (Asp-Glu-X-His) box polypeptide 58
19697	Rela	21.89	14.14	-0.63049	<0.001	Rela|v-rel reticuloendotheliosis viral oncogene homolog A (avian)
29857	Mapk12	40.28	26.13	-0.624357	<0.001	Mapk12|mitogen-activated protein kinase 12
54123	Irf7	30.55	10.36	-1.56015	<0.001	Irf7|interferon regulatory factor 7
EntrezID	Gene	N_TPM	DB_TPM	Log2 Ratio(DB/N)	FDR	Gene Description
Cytosolic DNA-sensing pathway [PATH:mmu04623]
100043714	Gm10774	108.19	221.05	1.03081	<0.001	ENSMUSG00000074846|predicted gene, ENSMUSG00000074846
12675	Chuk	28.7	63.96	1.15612	<0.001	Chuk|conserved helix-loop-helix ubiquitous kinase
54131	Irf3	41.35	76.84	0.89397	<0.001	Irf3|interferon regulatory factor 3
20018	Polr1d	23.84	42.27	0.82625	<0.001	Polr1d|polymerase (RNA) I polypeptide D
18035	Nfkbia	1.85	5.18	1.48543	<0.001	Nfkbia|nuclear factor of kappa light polypeptide gene enhancer in B-cells inhibitor, alpha
16151	Ikbkg	7.98	13.4	0.747772	<0.001	Ikbkg|inhibitor of kappaB kinase gamma
67486	Polr3g	4.67	8.37	0.841805	≥0.001	Polr3g|polymerase (RNA) III (DNA directed) polypeptide G
16173	Il18	6.03	8.96	0.571341	≥0.001	Il18|interleukin 18
228607	Mavs	4.57	7.11	0.637655	≥0.001	D430028G21Rik|RIKEN cDNA D430028G21 gene
56489	Ikbke	12.94	16.36	0.338335	≥0.001	Ikbke|inhibitor of kappaB kinase epsilon
67065	Polr3d	2.92	4.59	0.652526	≥0.001	Polr3d|polymerase (RNA) III (DNA directed) polypeptide D
56532	Ripk3	0.01	0.37	5.20945	≥0.001	Ripk3|receptor-interacting serine-threonine kinase 3
20303	Ccl4	0.01	0.37	5.20945	≥0.001	Ccl4|chemokine (C-C motif) ligand 4
66420	Polr2e	19.65	22.73	0.210068	≥0.001	Polr2e|polymerase (RNA) II (DNA directed) polypeptide E
19766	Ripk1	0.88	1.55	0.816693	≥0.001	Ripk1|receptor (TNFRSF)-interacting serine-threonine kinase 1
56417	Adar	6.71	8	0.253687	≥0.001	Adar|adenosine deaminase, RNA-specific
69870	Polr3gl	6.81	7.92	0.217846	≥0.001	Polr3gl|polymerase (RNA) III (DNA directed) polypeptide G like
22040	Trex1	5.25	6.14	0.225921	≥0.001	Trex1|three prime repair exonuclease 1
70428	Polr3b	2.92	3.26	0.158904	≥0.001	Polr3b|polymerase (RNA) III (DNA directed) polypeptide B
72512	Tmem173	1.46	1.63	0.158904	≥0.001	Tmem173|transmembrane protein 173
26939	Polr3e	3.7	3.85	0.0573332	≥0.001	Polr3e|polymerase (RNA) III (DNA directed) polypeptide E
78929	Polr3h	3.7	3.48	-0.088438	≥0.001	Polr3h|polymerase (RNA) III (DNA directed) polypeptide H
20304	Ccl5	1.56	1.33	-0.23012	≥0.001	Ccl5|chemokine (C-C motif) ligand 5
70408	Polr3f	2.72	2.29	-0.248259	≥0.001	Polr3f|polymerase (RNA) III (DNA directed) polypeptide F
16150	Ikbkb	0.88	0.59	-0.576789	≥0.001	Ikbkb|inhibitor of kappaB kinase beta
218832	Polr3a	4.38	3.7	-0.243406	≥0.001	Polr3a|polymerase (RNA) III (DNA directed) polypeptide A
66491	Polr2l	4.48	3.7	-0.275973	≥0.001	Polr2l|polymerase (RNA) II (DNA directed) polypeptide L
58203	Zbp1	6.81	5.63	-0.27452	≥0.001	Zbp1|Z-DNA binding protein 1
56480	Tbk1	10.41	8.59	-0.27724	≥0.001	Tbk1|TANK-binding kinase 1
20016	Polr1c	15.66	12.14	-0.367316	≥0.001	Polr1c|polymerase (RNA) I polypeptide C
383619	Aim2	7.69	4.96	-0.632643	≥0.001	Aim2|absent in melanoma 2
18033	Nfkb1	13.91	10.07	-0.466059	≥0.001	Nfkb1|nuclear factor of kappa light polypeptide gene enhancer in B-cells 1, p105
230073	Ddx58	4.57	2.07	-1.14256	≥0.001	Ddx58|DEAD (Asp-Glu-Ala-Asp) box polypeptide 58
69833	Polr2f	47.67	37.38	-0.350815	<0.001	Polr2f|polymerase (RNA) II (DNA directed) polypeptide F
16176	Il1b	3.21	0.81	-1.98658	<0.001	Il1b|interleukin 1 beta
19697	Rela	21.89	14.14	-0.63049	<0.001	Rela|v-rel reticuloendotheliosis viral oncogene homolog A (avian)
77125	Il33	3.41	0.67	-2.34754	<0.001	Il33|interleukin 33
54123	Irf7	30.55	10.36	-1.56015	<0.001	Irf7|interferon regulatory factor 7
EntrezID	Gene	N_TPM	DB_TPM	Log2 Ratio(DB/N)	FDR	Gene Description
Natural killer cell mediated cytotoxicity [PATH:mmu04650]
15007	H2-Q10	1675.92	2778.82	0.729519	<0.001	H2-Q10|histocompatibility 2, Q region locus 10
14972	H2-K1	693.1	1365.54	0.978336	<0.001	H2-K1|histocompatibility 2, K1, K region
22637	Zap70	6.13	35.61	2.53832	<0.001	Zap70|zeta-chain (TCR) associated protein kinase
15006	H2-Q1	2.72	14.36	2.40038	<0.001	H2-Q1|histocompatibility 2, Q region locus 1
26417	Mapk3	19.46	37.24	0.936341	<0.001	Mapk3|mitogen-activated protein kinase 3
15976	Ifnar2	77.25	109.49	0.503192	<0.001	Ifnar2|interferon (alpha and beta) receptor 2
14964	H2-Q2	109.16	143.62	0.395812	<0.001	H2-D1|histocompatibility 2, D region locus 1
26395	Map2k1	11.58	23.91	1.04598	<0.001	Map2k1|mitogen-activated protein kinase kinase 1
18751	Prkcb	0.01	1.48	7.20945	<0.001	Prkcb|protein kinase C, beta
19058	Ppp3r1	8.46	15.84	0.904843	<0.001	Ppp3r1|protein phosphatase 3, regulatory subunit B, alpha isoform (calcineurin B, type I)
26396	Map2k2	7.3	13.77	0.91556	<0.001	Map2k2|mitogen-activated protein kinase kinase 2
11836	Araf	21.4	31.17	0.542547	<0.001	Araf|v-raf murine sarcoma 3611 viral oncogene homolog
19229	Ptk2b	20.24	28.8	0.50886	<0.001	Ptk2b|PTK2 protein tyrosine kinase 2 beta
18018	Nfatc1	2.33	5.18	1.15262	≥0.001	Nfatc1|nuclear factor of activated T-cells, cytoplasmic, calcineurin-dependent 1
26413	Mapk1	12.65	18.06	0.513661	≥0.001	Mapk1|mitogen-activated protein kinase 1
12367	Casp3	0.01	0.89	6.47573	≥0.001	Casp3|caspase 3
18176	Nras	7	10.81	0.62694	≥0.001	Nras|neuroblastoma ras oncogene
21933	Tnfrsf10b	1.36	3.04	1.16046	≥0.001	Tnfrsf10b|tumor necrosis factor receptor superfamily, member 10b
24055	Sh3bp2	4.18	6.81	0.704152	≥0.001	Sh3bp2|SH3-domain binding protein 2
18750	Prkca	1.07	2.59	1.27534	≥0.001	Prkca|protein kinase C, alpha
19354	Rac2	0.29	1.18	2.02466	≥0.001	Rac2|RAS-related C3 botulinum substrate 2
15042	H2-T24	2.14	3.7	0.789914	≥0.001	H2-T24|histocompatibility 2, T region locus 24
14963	H2-Bl	0.39	1.18	1.59724	≥0.001	H2-Bl|histocompatibility 2, blastocyst
100044874	LOC100044874	1.56	2.74	0.81263	≥0.001	LOC100044874|similar to H-2K(d) antigen
14939	Gzmb	0.01	0.3	4.90689	≥0.001	Gzmb|granzyme B
100045864	LOC100045864	415.92	429.29	0.0456465	≥0.001	LOC100045864|similar to HLA-G protein
74769	Pik3cb	6.23	7.77	0.318682	≥0.001	Pik3cb|phosphatidylinositol 3-kinase, catalytic, beta polypeptide
16822	Lcp2	0.01	0.22	4.45943	≥0.001	Lcp2|lymphocyte cytosolic protein 2
18710	Pik3r3	0.01	0.22	4.45943	≥0.001	Pik3r3|phosphatidylinositol 3 kinase, regulatory subunit, polypeptide 3 (p55)
216148	Shc2	0.01	0.22	4.45943	≥0.001	Shc2|src homology 2 domain-containing transforming protein C2
20662	Sos1	0.01	0.22	4.45943	≥0.001	Sos1|Son of sevenless homolog 1 (Drosophila)
18706	Pik3ca	1.85	2.67	0.529314	≥0.001	Pik3ca|phosphatidylinositol 3-kinase, catalytic, alpha polypeptide
15979	Ifngr1	12.65	14.58	0.204853	≥0.001	Ifngr1|interferon gamma receptor 1
12122	Bid	7.49	8.96	0.258533	≥0.001	Bid|BH3 interacting domain death agonist
15461	Hras1	0.19	0.52	1.45251	≥0.001	Hras1|Harvey rat sarcoma virus oncogene 1
14102	Fas	9.63	11.18	0.215312	≥0.001	Fas|Fas (TNF receptor superfamily member 6)
20663	Sos2	2.92	3.78	0.372418	≥0.001	Sos2|Son of sevenless homolog 2 (Drosophila)
19057	Ppp3cc	2.72	3.48	0.355481	≥0.001	Ppp3cc|protein phosphatase 3, catalytic subunit, gamma isoform
14360	Fyn	2.04	2.67	0.388271	≥0.001	Fyn|Fyn proto-oncogene
30955	Pik3cg	0.01	0.15	3.90689	≥0.001	Pik3cg|phosphoinositide-3-kinase, catalytic, gamma polypeptide
73181	Nfatc4	0.49	0.81	0.72514	≥0.001	Nfatc4|nuclear factor of activated T-cells, cytoplasmic, calcineurin-dependent 4
19055	Ppp3ca	10.6	11.47	0.113801	≥0.001	Ppp3ca|protein phosphatase 3, catalytic subunit, alpha isoform
18709	Pik3r2	4.86	5.03	0.0496021	≥0.001	Pik3r2|phosphatidylinositol 3-kinase, regulatory subunit, polypeptide 2 (p85 beta)
16818	Lck	0.49	0.52	0.0857299	≥0.001	Lck|lymphocyte protein tyrosine kinase
57257	Vav3	0.29	0.3	0.0489096	≥0.001	Vav3|vav 3 oncogene
14784	Grb2	34.73	34.5	-0.00958605	≥0.001	Grb2|growth factor receptor bound protein 2
15894	Icam1	6.81	6.66	-0.0321326	≥0.001	Icam1|intercellular adhesion molecule 1
16653	Kras	21.6	21.17	-0.02901	≥0.001	Kras|v-Ki-ras2 Kirsten rat sarcoma viral oncogene homolog
15980	Ifngr2	8.27	7.85	-0.0751947	≥0.001	Ifngr2|interferon gamma receptor 2
109880	Braf	5.35	4.96	-0.109199	≥0.001	Braf|Braf transforming gene
19353	Rac1	110.23	108.16	-0.0273499	≥0.001	Rac1|RAS-related C3 botulinum substrate 1
22035	Tnfsf10	0.68	0.52	-0.387023	≥0.001	Tnfsf10|tumor necrosis factor (ligand) superfamily, member 10
23900	Hcst	1.26	1.04	-0.27684	≥0.001	Hcst|hematopoietic cell signal transducer
320207	Pik3r5	2.24	1.78	-0.331621	≥0.001	Pik3r5|phosphoinositide-3-kinase, regulatory subunit 5, p101
15896	Icam2	4.48	3.63	-0.303529	≥0.001	Icam2|intercellular adhesion molecule 2
22324	Vav1	3.21	2.37	-0.437686	≥0.001	Vav1|vav 1 oncogene
16408	Itgal	1.36	0.81	-0.747613	≥0.001	Itgal|integrin alpha L
18707	Pik3cd	1.85	1.18	-0.648738	≥0.001	Pik3cd|phosphatidylinositol 3-kinase catalytic delta polypeptide
20963	Syk	0.68	0.3	-1.18057	≥0.001	Syk|spleen tyrosine kinase
54446	Nfat5	7.49	6	-0.320003	≥0.001	Nfat5|nuclear factor of activated T-cells 5
170758	Rac3	0.29	0.01	-4.85798	≥0.001	Rac3|RAS-related C3 botulinum substrate 3
26904	Sh2d1b1	0.29	0.01	-4.85798	≥0.001	Sh2d1b1|SH2 domain protein 1B1
14103	Fasl	0.29	0.01	-4.85798	≥0.001	Fasl|Fas ligand (TNF superfamily, member 6)
234779	Plcg2	1.65	0.81	-1.02647	≥0.001	Plcg2|phospholipase C, gamma 2
19247	Ptpn11	5.74	3.85	-0.576192	≥0.001	Ptpn11|protein tyrosine phosphatase, non-receptor type 11
12506	Cd48	2.43	1.26	-0.947533	≥0.001	Cd48|CD48 antigen
16635	Klra4	0.39	0.01	-5.2854	≥0.001	Klra4|killer cell lectin-like receptor, subfamily A, member 4
15170	Ptpn6	16.25	12.73	-0.352207	≥0.001	Ptpn6|protein tyrosine phosphatase, non-receptor type 6
14991	H2-M3	3.5	1.92	-0.866249	≥0.001	H2-M3|histocompatibility 2, M region locus 3
271849	Shc4	0.49	0.01	-5.61471	≥0.001	Shc4|SHC (Src homology 2 domain containing) family, member 4
18019	Nfatc2	0.49	0.01	-5.61471	≥0.001	Nfatc2|nuclear factor of activated T-cells, cytoplasmic, calcineurin-dependent 2
14131	Fcgr3	3.89	1.92	-1.01866	≥0.001	Fcgr3|Fc receptor, IgG, low affinity III
18479	Pak1	1.36	0.3	-2.18057	≥0.001	Pak1|p21 (CDKN1A)-activated kinase 1
246256	Fcgr4	13.04	8.51	-0.615713	≥0.001	Fcgr4|Fc receptor, IgG, low affinity IV
16414	Itgb2	4.67	1.92	-1.28232	<0.001	Itgb2|integrin beta 2
18021	Nfatc3	6.62	3.18	-1.0578	<0.001	Nfatc3|nuclear factor of activated T-cells, cytoplasmic, calcineurin-dependent 3
18708	Pik3r1	13.72	8.44	-0.700966	<0.001	Pik3r1|phosphatidylinositol 3-kinase, regulatory subunit, polypeptide 1 (p85 alpha)
110157	Raf1	34.44	24.21	-0.508482	<0.001	Raf1|v-raf-leukemia viral oncogene 1
15975	Ifnar1	7.1	2	-1.82782	<0.001	Ifnar1|interferon (alpha and beta) receptor 1
22177	Tyrobp	42.32	27.39	-0.62769	<0.001	Tyrobp|TYRO protein tyrosine kinase binding protein
14127	Fcer1g	46.12	19.03	-1.27712	<0.001	Fcer1g|Fc receptor, IgE, high affinity I, gamma polypeptide
EntrezID	Gene	N_TPM	DB_TPM	Log2 Ratio(DB/N)	FDR	Gene Description
Antigen processing and presentation [PATH:mmu04612]
15007	H2-Q10	1675.92	2778.82	0.729519	<0.001	H2-Q10|histocompatibility 2, Q region locus 10
14972	H2-K1	693.1	1365.54	0.978336	<0.001	H2-K1|histocompatibility 2, K1, K region
16149	Cd74	93.3	152.28	0.706777	<0.001	Cd74|CD74 antigen (invariant polypeptide of major histocompatibility complex, class II antigen-associated)
15006	H2-Q1	2.72	14.36	2.40038	<0.001	H2-Q1|histocompatibility 2, Q region locus 1
19186	Psme1	135.23	188.4	0.478384	<0.001	Psme1|proteasome (prosome, macropain) 28 subunit, alpha
14969	H2-Eb1	22.67	43.9	0.953437	<0.001	H2-Eb1|histocompatibility 2, class II antigen E beta
14961	H2-Ab1	54.39	80.03	0.557199	<0.001	H2-Ab1|histocompatibility 2, class II antigen A, beta 1
14964	H2-Q2	109.16	143.62	0.395812	<0.001	H2-D1|histocompatibility 2, D region locus 1
21356	Tapbp	25.88	36.57	0.498823	<0.001	Tapbp|TAP binding protein
19188	Psme2	53.61	66.48	0.310418	<0.001	Psme2|proteasome (prosome, macropain) 28 subunit, beta
14828	Hspa5	287.69	314.99	0.130791	<0.001	Hspa5|heat shock protein 5
14960	H2-Aa	55.94	65.96	0.237711	≥0.001	H2-Aa|histocompatibility 2, class II antigen A, alpha
12317	Calr	131.15	145.69	0.151684	≥0.001	Calr|calreticulin
21354	Tap1	10.51	14.88	0.501612	≥0.001	Tap1|transporter 1, ATP-binding cassette, sub-family B (MDR/TAP)
53970	Rfx5	4.18	6.88	0.718906	≥0.001	Rfx5|regulatory factor X, 5 (influences HLA class II expression)
65972	Ifi30	9.53	13.25	0.475444	≥0.001	Ifi30|interferon gamma inducible protein 30
15042	H2-T24	2.14	3.7	0.789914	≥0.001	H2-T24|histocompatibility 2, T region locus 24
14963	H2-Bl	0.39	1.18	1.59724	≥0.001	H2-Bl|histocompatibility 2, blastocyst
100044874	LOC100044874	1.56	2.74	0.81263	≥0.001	LOC100044874|similar to H-2K(d) antigen
15000	H2-DMb2	0.01	0.3	4.90689	≥0.001	H2-DMb2|histocompatibility 2, class II, locus Mb2
100045864	LOC100045864	415.92	429.29	0.0456465	≥0.001	LOC100045864|similar to HLA-G protein
12912	Creb1	0.29	0.67	1.20811	≥0.001	Creb1|cAMP responsive element binding protein 1
19141	Lgmn	31.04	33.02	0.0892116	≥0.001	Lgmn|legumain
18046	Nfyc	17.41	17.99	0.047279	≥0.001	Nfyc|nuclear transcription factor-Y gamma
170767	Rfxap	6.52	6.37	-0.0335786	≥0.001	Rfxap|regulatory factor X-associated protein
18044	Nfya	5.84	5.48	-0.0917925	≥0.001	Nfya|nuclear transcription factor-Y alpha
15001	H2-Oa	0.29	0.15	-0.95109	≥0.001	H2-Oa|histocompatibility 2, O region alpha locus
14827	Pdia3	0.49	0.22	-1.15528	≥0.001	Pdia3|protein disulfide isomerase associated 3
12330	Canx	3.7	2.81	-0.396955	≥0.001	Canx|calnexin
13039	Ctsl	1.56	0.81	-0.945552	≥0.001	Ctsl|cathepsin L
19727	Rfxank	4.38	2.96	-0.565334	≥0.001	Rfxank|regulatory factor X-associated ankyrin-containing protein
15002	H2-Ob	0.29	0.01	-4.85798	≥0.001	H2-Ob|histocompatibility 2, O region beta locus
14999	H2-DMb1	7.3	5.11	-0.514573	≥0.001	H2-DMb1|histocompatibility 2, class II, locus Mb1
13030	Ctsb	9.53	6.96	-0.453389	≥0.001	Ctsb|cathepsin B
14991	H2-M3	3.5	1.92	-0.866249	≥0.001	H2-M3|histocompatibility 2, M region locus 3
12504	Cd4	1.46	0.3	-2.28293	≥0.001	Cd4|CD4 antigen
13040	Ctss	46.41	36.57	-0.343775	<0.001	Ctss|cathepsin S
19192	Psme3	20.92	12.73	-0.71665	<0.001	Psme3|proteaseome (prosome, macropain) 28 subunit, 3
21355	Tap2	15.27	8.22	-0.89349	<0.001	Tap2|transporter 2, ATP-binding cassette, sub-family B (MDR/TAP)
18045	Nfyb	19.75	10.36	-0.930829	<0.001	Nfyb|nuclear transcription factor-Y beta
15525	Hspa4	10.99	3.11	-1.8212	<0.001	Hspa4|heat shock protein 4
15519	Hsp90aa1	72.97	46.19	-0.659723	<0.001	Hsp90aa1|heat shock protein 90, alpha (cytosolic), class A member 1
15516	Hsp90ab1	534.41	298.19	-0.841715	<0.001	Hsp90ab1|heat shock protein 90 alpha (cytosolic), class B member 1
12010	B2m	3533.09	2517.8	-0.488767	<0.001	B2m|beta-2 microglobulin
EntrezID	Gene	N_TPM	DB_TPM	Log2 Ratio(DB/N)	FDR	Gene Description
T cell receptor signaling pathway [PATH:mmu04660]
22637	Zap70	6.13	35.61	2.53832	<0.001	Zap70|zeta-chain (TCR) associated protein kinase
12675	Chuk	28.7	63.96	1.15612	<0.001	Chuk|conserved helix-loop-helix ubiquitous kinase
26417	Mapk3	19.46	37.24	0.936341	<0.001	Mapk3|mitogen-activated protein kinase 3
228026	Pdk1	8.95	21.32	1.25225	<0.001	Pdk1|pyruvate dehydrogenase kinase, isoenzyme 1
26395	Map2k1	11.58	23.91	1.04598	<0.001	Map2k1|mitogen-activated protein kinase kinase 1
26400	Map2k7	0.01	1.55	7.27612	<0.001	Map2k7|mitogen-activated protein kinase kinase 7
19058	Ppp3r1	8.46	15.84	0.904843	<0.001	Ppp3r1|protein phosphatase 3, regulatory subunit B, alpha isoform (calcineurin B, type I)
26396	Map2k2	7.3	13.77	0.91556	<0.001	Map2k2|mitogen-activated protein kinase kinase 2
26420	Mapk9	19.85	29.46	0.569618	<0.001	Mapk9|mitogen-activated protein kinase 9
18035	Nfkbia	1.85	5.18	1.48543	<0.001	Nfkbia|nuclear factor of kappa light polypeptide gene enhancer in B-cells inhibitor, alpha
16151	Ikbkg	7.98	13.4	0.747772	<0.001	Ikbkg|inhibitor of kappaB kinase gamma
70584	Pak4	4.48	8.29	0.887873	≥0.001	Pak4|p21 (CDKN1A)-activated kinase 4
18018	Nfatc1	2.33	5.18	1.15262	≥0.001	Nfatc1|nuclear factor of activated T-cells, cytoplasmic, calcineurin-dependent 1
26413	Mapk1	12.65	18.06	0.513661	≥0.001	Mapk1|mitogen-activated protein kinase 1
18176	Nras	7	10.81	0.62694	≥0.001	Nras|neuroblastoma ras oncogene
12042	Bcl10	4.18	7.18	0.780481	≥0.001	Bcl10|B-cell leukemia/lymphoma 10
18037	Nfkbie	0.97	2.22	1.1945	≥0.001	Nfkbie|nuclear factor of kappa light polypeptide gene enhancer in B-cells inhibitor, epsilon
16476	Jun	5.84	8.22	0.49317	≥0.001	Jun|Jun oncogene
26416	Mapk14	11.38	14.58	0.35749	≥0.001	Mapk14|mitogen-activated protein kinase 14
17973	Nck1	3.89	5.63	0.533365	≥0.001	Nck1|non-catalytic region of tyrosine kinase adaptor protein 1
26409	Map3k7	4.18	5.92	0.502094	≥0.001	Map3k7|mitogen-activated protein kinase kinase kinase 7
12502	Cd3g	0.01	0.37	5.20945	≥0.001	Cd3g|CD3 antigen, gamma polypeptide
18761	Prkcq	0.01	0.37	5.20945	≥0.001	Prkcq|protein kinase C, theta
208650	Cblb	1.95	3.18	0.705553	≥0.001	Cblb|Casitas B-lineage lymphoma b
26410	Map3k8	0.68	1.41	1.05209	≥0.001	Map3k8|mitogen-activated protein kinase kinase kinase 8
74769	Pik3cb	6.23	7.77	0.318682	≥0.001	Pik3cb|phosphatidylinositol 3-kinase, catalytic, beta polypeptide
16822	Lcp2	0.01	0.22	4.45943	≥0.001	Lcp2|lymphocyte cytosolic protein 2
20662	Sos1	0.01	0.22	4.45943	≥0.001	Sos1|Son of sevenless homolog 1 (Drosophila)
108723	Card11	0.01	0.22	4.45943	≥0.001	Card11|caspase recruitment domain family, member 11
18710	Pik3r3	0.01	0.22	4.45943	≥0.001	Pik3r3|phosphatidylinositol 3 kinase, regulatory subunit, polypeptide 3 (p55)
18706	Pik3ca	1.85	2.67	0.529314	≥0.001	Pik3ca|phosphatidylinositol 3-kinase, catalytic, alpha polypeptide
15461	Hras1	0.19	0.52	1.45251	≥0.001	Hras1|Harvey rat sarcoma virus oncogene 1
20663	Sos2	2.92	3.78	0.372418	≥0.001	Sos2|Son of sevenless homolog 2 (Drosophila)
19057	Ppp3cc	2.72	3.48	0.355481	≥0.001	Ppp3cc|protein phosphatase 3, catalytic subunit, gamma isoform
14360	Fyn	2.04	2.67	0.388271	≥0.001	Fyn|Fyn proto-oncogene
30955	Pik3cg	0.01	0.15	3.90689	≥0.001	Pik3cg|phosphoinositide-3-kinase, catalytic, gamma polypeptide
73181	Nfatc4	0.49	0.81	0.72514	≥0.001	Nfatc4|nuclear factor of activated T-cells, cytoplasmic, calcineurin-dependent 4
23797	Akt3	0.39	0.67	0.780687	≥0.001	Akt3|thymoma viral proto-oncogene 3
21682	Tec	5.84	6.51	0.156689	≥0.001	Tec|cytoplasmic tyrosine kinase, Dscr28C related (Drosophila)
19055	Ppp3ca	10.6	11.47	0.113801	≥0.001	Ppp3ca|protein phosphatase 3, catalytic subunit, alpha isoform
53859	Map3k14	0.58	0.67	0.208108	≥0.001	Map3k14|mitogen-activated protein kinase kinase kinase 14
18709	Pik3r2	4.86	5.03	0.0496021	≥0.001	Pik3r2|phosphatidylinositol 3-kinase, regulatory subunit, polypeptide 2 (p85 beta)
16818	Lck	0.49	0.52	0.0857299	≥0.001	Lck|lymphocyte protein tyrosine kinase
57257	Vav3	0.29	0.3	0.0489096	≥0.001	Vav3|vav 3 oncogene
14784	Grb2	34.73	34.5	-0.00958605	≥0.001	Grb2|growth factor receptor bound protein 2
16653	Kras	21.6	21.17	-0.02901	≥0.001	Kras|v-Ki-ras2 Kirsten rat sarcoma viral oncogene homolog
224105	Pak2	7.59	7.25	-0.0661189	≥0.001	Pak2|p21 (CDKN1A)-activated kinase 2
12500	Cd3d	1.95	1.55	-0.331206	≥0.001	Cd3d|CD3 antigen, delta polypeptide
320207	Pik3r5	2.24	1.78	-0.331621	≥0.001	Pik3r5|phosphoinositide-3-kinase, regulatory subunit 5, p101
16150	Ikbkb	0.88	0.59	-0.576789	≥0.001	Ikbkb|inhibitor of kappaB kinase beta
12501	Cd3e	0.39	0.15	-1.37851	≥0.001	Cd3e|CD3 antigen, epsilon polypeptide
12540	Cdc42	82.11	77.95	-0.0750089	≥0.001	Cdc42|cell division cycle 42 homolog (S. cerevisiae)
22324	Vav1	3.21	2.37	-0.437686	≥0.001	Vav1|vav 1 oncogene
14281	Fos	1.85	1.18	-0.648738	≥0.001	Fos|FBJ osteosarcoma oncogene
18707	Pik3cd	1.85	1.18	-0.648738	≥0.001	Pik3cd|phosphatidylinositol 3-kinase catalytic delta polypeptide
54446	Nfat5	7.49	6	-0.320003	≥0.001	Nfat5|nuclear factor of activated T-cells 5
12402	Cbl	0.39	0.01	-5.2854	≥0.001	Cbl|Casitas B-lineage lymphoma
15170	Ptpn6	16.25	12.73	-0.352207	≥0.001	Ptpn6|protein tyrosine phosphatase, non-receptor type 6
18019	Nfatc2	0.49	0.01	-5.61471	≥0.001	Nfatc2|nuclear factor of activated T-cells, cytoplasmic, calcineurin-dependent 2
18033	Nfkb1	13.91	10.07	-0.466059	≥0.001	Nfkb1|nuclear factor of kappa light polypeptide gene enhancer in B-cells 1, p105
18479	Pak1	1.36	0.3	-2.18057	≥0.001	Pak1|p21 (CDKN1A)-activated kinase 1
21947	Cd40lg	0.68	0.01	-6.08746	≥0.001	Cd40lg|CD40 ligand
12504	Cd4	1.46	0.3	-2.28293	≥0.001	Cd4|CD4 antigen
26415	Mapk13	1.17	0.15	-2.96347	≥0.001	Mapk13|mitogen-activated protein kinase 13
16428	Itk	0.78	0.01	-6.2854	≥0.001	Itk|IL2-inducible T-cell kinase
56637	Gsk3b	15.57	10.51	-0.567006	≥0.001	Gsk3b|glycogen synthase kinase 3 beta
18021	Nfatc3	6.62	3.18	-1.0578	<0.001	Nfatc3|nuclear factor of activated T-cells, cytoplasmic, calcineurin-dependent 3
18708	Pik3r1	13.72	8.44	-0.700966	<0.001	Pik3r1|phosphatidylinositol 3-kinase, regulatory subunit, polypeptide 1 (p85 alpha)
13383	Dlg1	11.19	6.29	-0.831078	<0.001	Dlg1|discs, large homolog 1 (Drosophila)
19094	Mapk11	1.75	0.22	-2.99178	<0.001	Mapk11|mitogen-activated protein kinase 11
19697	Rela	21.89	14.14	-0.63049	<0.001	Rela|v-rel reticuloendotheliosis viral oncogene homolog A (avian)
110157	Raf1	34.44	24.21	-0.508482	<0.001	Raf1|v-raf-leukemia viral oncogene 1
29857	Mapk12	40.28	26.13	-0.624357	<0.001	Mapk12|mitogen-activated protein kinase 12
80794	Cblc	25	13.1	-0.932361	<0.001	Cblc|Casitas B-lineage lymphoma c
19419	Rasgrp1	22.18	8.22	-1.43205	<0.001	Rasgrp1|RAS guanyl releasing protein 1
EntrezID	Gene	N_TPM	DB_TPM	Log2 Ratio(DB/N)	FDR	Gene Description
B cell receptor signaling pathway [PATH:mmu04662]
12675	Chuk	28.7	63.96	1.15612	<0.001	Chuk|conserved helix-loop-helix ubiquitous kinase
26417	Mapk3	19.46	37.24	0.936341	<0.001	Mapk3|mitogen-activated protein kinase 3
12520	Cd81	179.11	222.75	0.31458	<0.001	Cd81|CD81 antigen
26395	Map2k1	11.58	23.91	1.04598	<0.001	Map2k1|mitogen-activated protein kinase kinase 1
18751	Prkcb	0.01	1.48	7.20945	<0.001	Prkcb|protein kinase C, beta
19058	Ppp3r1	8.46	15.84	0.904843	<0.001	Ppp3r1|protein phosphatase 3, regulatory subunit B, alpha isoform (calcineurin B, type I)
26396	Map2k2	7.3	13.77	0.91556	<0.001	Map2k2|mitogen-activated protein kinase kinase 2
18035	Nfkbia	1.85	5.18	1.48543	<0.001	Nfkbia|nuclear factor of kappa light polypeptide gene enhancer in B-cells inhibitor, alpha
16151	Ikbkg	7.98	13.4	0.747772	<0.001	Ikbkg|inhibitor of kappaB kinase gamma
18018	Nfatc1	2.33	5.18	1.15262	≥0.001	Nfatc1|nuclear factor of activated T-cells, cytoplasmic, calcineurin-dependent 1
26413	Mapk1	12.65	18.06	0.513661	≥0.001	Mapk1|mitogen-activated protein kinase 1
18176	Nras	7	10.81	0.62694	≥0.001	Nras|neuroblastoma ras oncogene
12042	Bcl10	4.18	7.18	0.780481	≥0.001	Bcl10|B-cell leukemia/lymphoma 10
16331	Inpp5d	1.07	2.52	1.23581	≥0.001	Inpp5d|inositol polyphosphate-5-phosphatase D
19354	Rac2	0.29	1.18	2.02466	≥0.001	Rac2|RAS-related C3 botulinum substrate 2
18037	Nfkbie	0.97	2.22	1.1945	≥0.001	Nfkbie|nuclear factor of kappa light polypeptide gene enhancer in B-cells inhibitor, epsilon
26377	Dapp1	0.01	0.52	5.70044	≥0.001	Dapp1|dual adaptor for phosphotyrosine and 3-phosphoinositides 1
16476	Jun	5.84	8.22	0.49317	≥0.001	Jun|Jun oncogene
12478	Cd19	0.68	1.33	0.96782	≥0.001	Cd19|CD19 antigen
74769	Pik3cb	6.23	7.77	0.318682	≥0.001	Pik3cb|phosphatidylinositol 3-kinase, catalytic, beta polypeptide
20662	Sos1	0.01	0.22	4.45943	≥0.001	Sos1|Son of sevenless homolog 1 (Drosophila)
108723	Card11	0.01	0.22	4.45943	≥0.001	Card11|caspase recruitment domain family, member 11
18710	Pik3r3	0.01	0.22	4.45943	≥0.001	Pik3r3|phosphatidylinositol 3 kinase, regulatory subunit, polypeptide 3 (p55)
18706	Pik3ca	1.85	2.67	0.529314	≥0.001	Pik3ca|phosphatidylinositol 3-kinase, catalytic, alpha polypeptide
15461	Hras1	0.19	0.52	1.45251	≥0.001	Hras1|Harvey rat sarcoma virus oncogene 1
20663	Sos2	2.92	3.78	0.372418	≥0.001	Sos2|Son of sevenless homolog 2 (Drosophila)
19057	Ppp3cc	2.72	3.48	0.355481	≥0.001	Ppp3cc|protein phosphatase 3, catalytic subunit, gamma isoform
30955	Pik3cg	0.01	0.15	3.90689	≥0.001	Pik3cg|phosphoinositide-3-kinase, catalytic, gamma polypeptide
73181	Nfatc4	0.49	0.81	0.72514	≥0.001	Nfatc4|nuclear factor of activated T-cells, cytoplasmic, calcineurin-dependent 4
23797	Akt3	0.39	0.67	0.780687	≥0.001	Akt3|thymoma viral proto-oncogene 3
19055	Ppp3ca	10.6	11.47	0.113801	≥0.001	Ppp3ca|protein phosphatase 3, catalytic subunit, alpha isoform
240168	Rasgrp3	1.26	1.41	0.162271	≥0.001	Rasgrp3|RAS, guanyl releasing protein 3
18709	Pik3r2	4.86	5.03	0.0496021	≥0.001	Pik3r2|phosphatidylinositol 3-kinase, regulatory subunit, polypeptide 2 (p85 beta)
68713	Ifitm1	5.16	5.26	0.0276917	≥0.001	Ifitm1|interferon induced transmembrane protein 1
57257	Vav3	0.29	0.3	0.0489096	≥0.001	Vav3|vav 3 oncogene
14784	Grb2	34.73	34.5	-0.00958605	≥0.001	Grb2|growth factor receptor bound protein 2
16653	Kras	21.6	21.17	-0.02901	≥0.001	Kras|v-Ki-ras2 Kirsten rat sarcoma viral oncogene homolog
83490	Pik3ap1	0.58	0.52	-0.157541	≥0.001	Pik3ap1|phosphoinositide-3-kinase adaptor protein 1
19353	Rac1	110.23	108.16	-0.0273499	≥0.001	Rac1|RAS-related C3 botulinum substrate 1
12229	Btk	0.58	0.37	-0.648528	≥0.001	Btk|Bruton agammaglobulinemia tyrosine kinase
14130	Fcgr2b	11.09	10.07	-0.139196	≥0.001	Fcgr2b|Fc receptor, IgG, low affinity IIb
320207	Pik3r5	2.24	1.78	-0.331621	≥0.001	Pik3r5|phosphoinositide-3-kinase, regulatory subunit 5, p101
16150	Ikbkb	0.88	0.59	-0.576789	≥0.001	Ikbkb|inhibitor of kappaB kinase beta
22324	Vav1	3.21	2.37	-0.437686	≥0.001	Vav1|vav 1 oncogene
12517	Cd72	5.74	4.59	-0.322557	≥0.001	Cd72|CD72 antigen
17060	Blnk	1.07	0.59	-0.858824	≥0.001	Blnk|B-cell linker
14281	Fos	1.85	1.18	-0.648738	≥0.001	Fos|FBJ osteosarcoma oncogene
18707	Pik3cd	1.85	1.18	-0.648738	≥0.001	Pik3cd|phosphatidylinositol 3-kinase catalytic delta polypeptide
20963	Syk	0.68	0.3	-1.18057	≥0.001	Syk|spleen tyrosine kinase
54446	Nfat5	7.49	6	-0.320003	≥0.001	Nfat5|nuclear factor of activated T-cells 5
12518	Cd79a	0.29	0.01	-4.85798	≥0.001	Cd79a|CD79A antigen (immunoglobulin-associated alpha)
170758	Rac3	0.29	0.01	-4.85798	≥0.001	Rac3|RAS-related C3 botulinum substrate 3
234779	Plcg2	1.65	0.81	-1.02647	≥0.001	Plcg2|phospholipase C, gamma 2
15170	Ptpn6	16.25	12.73	-0.352207	≥0.001	Ptpn6|protein tyrosine phosphatase, non-receptor type 6
18019	Nfatc2	0.49	0.01	-5.61471	≥0.001	Nfatc2|nuclear factor of activated T-cells, cytoplasmic, calcineurin-dependent 2
18033	Nfkb1	13.91	10.07	-0.466059	≥0.001	Nfkb1|nuclear factor of kappa light polypeptide gene enhancer in B-cells 1, p105
15985	Cd79b	4.67	2.44	-0.936541	≥0.001	Cd79b|CD79B antigen
56637	Gsk3b	15.57	10.51	-0.567006	≥0.001	Gsk3b|glycogen synthase kinase 3 beta
18021	Nfatc3	6.62	3.18	-1.0578	<0.001	Nfatc3|nuclear factor of activated T-cells, cytoplasmic, calcineurin-dependent 3
18708	Pik3r1	13.72	8.44	-0.700966	<0.001	Pik3r1|phosphatidylinositol 3-kinase, regulatory subunit, polypeptide 1 (p85 alpha)
18733	Lilrb3	4.86	1.92	-1.33985	<0.001	Lilrb3|leukocyte immunoglobulin-like receptor, subfamily B (with TM and ITIM domains), member 3
19697	Rela	21.89	14.14	-0.63049	<0.001	Rela|v-rel reticuloendotheliosis viral oncogene homolog A (avian)
110157	Raf1	34.44	24.21	-0.508482	<0.001	Raf1|v-raf-leukemia viral oncogene 1
EntrezID	Gene	N_TPM	DB_TPM	Log2 Ratio(DB/N)	FDR	Gene Description
Fc epsilon RI signaling pathway [PATH:mmu04664]
26397	Map2k3	21.6	59.45	1.46065	<0.001	Map2k3|mitogen-activated protein kinase kinase 3
26417	Mapk3	19.46	37.24	0.936341	<0.001	Mapk3|mitogen-activated protein kinase 3
228026	Pdk1	8.95	21.32	1.25225	<0.001	Pdk1|pyruvate dehydrogenase kinase, isoenzyme 1
66350	Pla2g12a	5.25	15.18	1.53178	<0.001	Pla2g12a|phospholipase A2, group XIIA
26395	Map2k1	11.58	23.91	1.04598	<0.001	Map2k1|mitogen-activated protein kinase kinase 1
26400	Map2k7	0.01	1.55	7.27612	<0.001	Map2k7|mitogen-activated protein kinase kinase 7
18751	Prkcb	0.01	1.48	7.20945	<0.001	Prkcb|protein kinase C, beta
26396	Map2k2	7.3	13.77	0.91556	<0.001	Map2k2|mitogen-activated protein kinase kinase 2
26420	Mapk9	19.85	29.46	0.569618	<0.001	Mapk9|mitogen-activated protein kinase 9
26413	Mapk1	12.65	18.06	0.513661	≥0.001	Mapk1|mitogen-activated protein kinase 1
26399	Map2k6	1.07	2.89	1.43346	≥0.001	Map2k6|mitogen-activated protein kinase kinase 6
18176	Nras	7	10.81	0.62694	≥0.001	Nras|neuroblastoma ras oncogene
18750	Prkca	1.07	2.59	1.27534	≥0.001	Prkca|protein kinase C, alpha
16331	Inpp5d	1.07	2.52	1.23581	≥0.001	Inpp5d|inositol polyphosphate-5-phosphatase D
19354	Rac2	0.29	1.18	2.02466	≥0.001	Rac2|RAS-related C3 botulinum substrate 2
26416	Mapk14	11.38	14.58	0.35749	≥0.001	Mapk14|mitogen-activated protein kinase 14
18753	Prkcd	6.62	8.74	0.400802	≥0.001	Prkcd|protein kinase C, delta
53357	Pla2g6	8.37	10.36	0.307724	≥0.001	Pla2g6|phospholipase A2, group VI
74769	Pik3cb	6.23	7.77	0.318682	≥0.001	Pik3cb|phosphatidylinositol 3-kinase, catalytic, beta polypeptide
18710	Pik3r3	0.01	0.22	4.45943	≥0.001	Pik3r3|phosphatidylinositol 3 kinase, regulatory subunit, polypeptide 3 (p55)
16822	Lcp2	0.01	0.22	4.45943	≥0.001	Lcp2|lymphocyte cytosolic protein 2
20662	Sos1	0.01	0.22	4.45943	≥0.001	Sos1|Son of sevenless homolog 1 (Drosophila)
18706	Pik3ca	1.85	2.67	0.529314	≥0.001	Pik3ca|phosphatidylinositol 3-kinase, catalytic, alpha polypeptide
26398	Map2k4	8.95	10.59	0.242743	≥0.001	Map2k4|mitogen-activated protein kinase kinase 4
18783	Pla2g4a	1.07	1.7	0.667924	≥0.001	Pla2g4a|phospholipase A2, group IVA (cytosolic, calcium-dependent)
15461	Hras1	0.19	0.52	1.45251	≥0.001	Hras1|Harvey rat sarcoma virus oncogene 1
20663	Sos2	2.92	3.78	0.372418	≥0.001	Sos2|Son of sevenless homolog 2 (Drosophila)
14360	Fyn	2.04	2.67	0.388271	≥0.001	Fyn|Fyn proto-oncogene
30955	Pik3cg	0.01	0.15	3.90689	≥0.001	Pik3cg|phosphoinositide-3-kinase, catalytic, gamma polypeptide
26970	Pla2g2e	0.01	0.15	3.90689	≥0.001	Pla2g2e|phospholipase A2, group IIE
23797	Akt3	0.39	0.67	0.780687	≥0.001	Akt3|thymoma viral proto-oncogene 3
69836	Pla2g12b	77.25	79.73	0.0455877	≥0.001	Pla2g12b|phospholipase A2, group XIIB
211429	Pla2g4b	0.68	0.89	0.388271	≥0.001	Pla2g4b|phospholipase A2, group IVB (cytosolic)
18709	Pik3r2	4.86	5.03	0.0496021	≥0.001	Pik3r2|phosphatidylinositol 3-kinase, regulatory subunit, polypeptide 2 (p85 beta)
57257	Vav3	0.29	0.3	0.0489096	≥0.001	Vav3|vav 3 oncogene
14784	Grb2	34.73	34.5	-0.00958605	≥0.001	Grb2|growth factor receptor bound protein 2
16653	Kras	21.6	21.17	-0.02901	≥0.001	Kras|v-Ki-ras2 Kirsten rat sarcoma viral oncogene homolog
19353	Rac1	110.23	108.16	-0.0273499	≥0.001	Rac1|RAS-related C3 botulinum substrate 1
12229	Btk	0.58	0.37	-0.648528	≥0.001	Btk|Bruton agammaglobulinemia tyrosine kinase
320207	Pik3r5	2.24	1.78	-0.331621	≥0.001	Pik3r5|phosphoinositide-3-kinase, regulatory subunit 5, p101
22324	Vav1	3.21	2.37	-0.437686	≥0.001	Vav1|vav 1 oncogene
18707	Pik3cd	1.85	1.18	-0.648738	≥0.001	Pik3cd|phosphatidylinositol 3-kinase catalytic delta polypeptide
20963	Syk	0.68	0.3	-1.18057	≥0.001	Syk|spleen tyrosine kinase
170758	Rac3	0.29	0.01	-4.85798	≥0.001	Rac3|RAS-related C3 botulinum substrate 3
234779	Plcg2	1.65	0.81	-1.02647	≥0.001	Plcg2|phospholipase C, gamma 2
26419	Mapk8	0.78	0.22	-1.82597	≥0.001	Mapk8|mitogen-activated protein kinase 8
26415	Mapk13	1.17	0.15	-2.96347	≥0.001	Mapk13|mitogen-activated protein kinase 13
18708	Pik3r1	13.72	8.44	-0.700966	<0.001	Pik3r1|phosphatidylinositol 3-kinase, regulatory subunit, polypeptide 1 (p85 alpha)
19094	Mapk11	1.75	0.22	-2.99178	<0.001	Mapk11|mitogen-activated protein kinase 11
110157	Raf1	34.44	24.21	-0.508482	<0.001	Raf1|v-raf-leukemia viral oncogene 1
29857	Mapk12	40.28	26.13	-0.624357	<0.001	Mapk12|mitogen-activated protein kinase 12
14127	Fcer1g	46.12	19.03	-1.27712	<0.001	Fcer1g|Fc receptor, IgE, high affinity I, gamma polypeptide
EntrezID	Gene	N_TPM	DB_TPM	Log2 Ratio(DB/N)	FDR	Gene Description
Fc gamma R-mediated phagocytosis [PATH:mmu04666]
67916	Ppap2b	28.21	66.77	1.24299	<0.001	Ppap2b|phosphatidic acid phosphatase type 2B
76709	Arpc2	88.83	143.99	0.69685	<0.001	Arpc2|actin related protein 2/3 complex, subunit 2
56378	Arpc3	24.42	48.79	0.998522	<0.001	Arpc3|actin related protein 2/3 complex, subunit 3
56443	Arpc1a	32.69	57.45	0.813458	<0.001	Arpc1a|actin related protein 2/3 complex, subunit 1A
13196	Asap1	3.6	13.47	1.90368	<0.001	Asap1|ArfGAP with SH# domain, ankyrin repeat and PH domain1
26417	Mapk3	19.46	37.24	0.936341	<0.001	Mapk3|mitogen-activated protein kinase 3
26395	Map2k1	11.58	23.91	1.04598	<0.001	Map2k1|mitogen-activated protein kinase kinase 1
13430	Dnm2	8.37	18.58	1.15045	<0.001	Dnm2|dynamin 2
18751	Prkcb	0.01	1.48	7.20945	<0.001	Prkcb|protein kinase C, beta
22323	Vasp	2.82	7.11	1.33415	<0.001	Vasp|vasodilator-stimulated phosphoprotein
12928	Crk	6.03	11.7	0.956279	<0.001	Crk|v-crk sarcoma virus CT10 oncogene homolog (avian)
16885	Limk1	2.53	5.7	1.17182	<0.001	Limk1|LIM-domain containing, protein kinase
26413	Mapk1	12.65	18.06	0.513661	≥0.001	Mapk1|mitogen-activated protein kinase 1
18750	Prkca	1.07	2.59	1.27534	≥0.001	Prkca|protein kinase C, alpha
16331	Inpp5d	1.07	2.52	1.23581	≥0.001	Inpp5d|inositol polyphosphate-5-phosphatase D
19354	Rac2	0.29	1.18	2.02466	≥0.001	Rac2|RAS-related C3 botulinum substrate 2
56632	Sphk2	18.49	22.5	0.28318	≥0.001	Sphk2|sphingosine kinase 2
72508	Rps6kb1	2.63	4.15	0.658049	≥0.001	Rps6kb1|ribosomal protein S6 kinase, polypeptide 1
18753	Prkcd	6.62	8.74	0.400802	≥0.001	Prkcd|protein kinase C, delta
83767	Wasf1	0.19	0.67	1.81816	≥0.001	Wasf1|WASP family 1
242687	Wasf2	0.01	0.3	4.90689	≥0.001	Wasf2|WAS protein family, member 2
53357	Pla2g6	8.37	10.36	0.307724	≥0.001	Pla2g6|phospholipase A2, group VI
12632	Cfl2	11.87	14.21	0.259587	≥0.001	Cfl2|cofilin 2, muscle
100048522	LOC100048522	0.29	0.74	1.35147	≥0.001	LOC100048522|similar to Cofilin-1 (Cofilin, non-muscle isoform)
74769	Pik3cb	6.23	7.77	0.318682	≥0.001	Pik3cb|phosphatidylinositol 3-kinase, catalytic, beta polypeptide
18710	Pik3r3	0.01	0.22	4.45943	≥0.001	Pik3r3|phosphatidylinositol 3 kinase, regulatory subunit, polypeptide 3 (p55)
18706	Pik3ca	1.85	2.67	0.529314	≥0.001	Pik3ca|phosphatidylinositol 3-kinase, catalytic, alpha polypeptide
18783	Pla2g4a	1.07	1.7	0.667924	≥0.001	Pla2g4a|phospholipase A2, group IVA (cytosolic, calcium-dependent)
73178	Wasl	9.34	10.96	0.230753	≥0.001	Wasl|Wiskott-Aldrich syndrome-like (human)
30955	Pik3cg	0.01	0.15	3.90689	≥0.001	Pik3cg|phosphoinositide-3-kinase, catalytic, gamma polypeptide
58988	Rps6kb2	0.01	0.15	3.90689	≥0.001	Rps6kb2|ribosomal protein S6 kinase, polypeptide 2
22376	Was	0.01	0.15	3.90689	≥0.001	Was|Wiskott-Aldrich syndrome homolog (human)
23797	Akt3	0.39	0.67	0.780687	≥0.001	Akt3|thymoma viral proto-oncogene 3
18805	Pld1	2.82	3.33	0.239827	≥0.001	Pld1|phospholipase D1
211914	Asap2	5.64	6.14	0.122543	≥0.001	Ddef2|development and differentiation enhancing factor 2
230837	Asap3	3.6	4	0.152003	≥0.001	Asap3|ArfGAP with SH3 domain, ankyrin repeat and PH domain 3
17357	Marcksl1	6.81	7.03	0.0458699	≥0.001	Marcksl1|MARCKS-like 1
18709	Pik3r2	4.86	5.03	0.0496021	≥0.001	Pik3r2|phosphatidylinositol 3-kinase, regulatory subunit, polypeptide 2 (p85 beta)
57257	Vav3	0.29	0.3	0.0489096	≥0.001	Vav3|vav 3 oncogene
17969	Ncf1	0.97	0.96	-0.0149503	≥0.001	Ncf1|neutrophil cytosolic factor 1
19012	Ppap2a	9.73	9.18	-0.0839457	≥0.001	Ppap2a|phosphatidic acid phosphatase type 2A
19353	Rac1	110.23	108.16	-0.0273499	≥0.001	Rac1|RAS-related C3 botulinum substrate 1
17118	Marcks	8.95	8.37	-0.0966601	≥0.001	Marcks|myristoylated alanine rich protein kinase C substrate
18806	Pld2	3.79	3.26	-0.217326	≥0.001	Pld2|phospholipase D2
12929	Crkl	0.39	0.22	-0.825971	≥0.001	Crkl|v-crk sarcoma virus CT10 oncogene homolog (avian)-like
14130	Fcgr2b	11.09	10.07	-0.139196	≥0.001	Fcgr2b|Fc receptor, IgG, low affinity IIb
320207	Pik3r5	2.24	1.78	-0.331621	≥0.001	Pik3r5|phosphoinositide-3-kinase, regulatory subunit 5, p101
12540	Cdc42	82.11	77.95	-0.0750089	≥0.001	Cdc42|cell division cycle 42 homolog (S. cerevisiae)
22324	Vav1	3.21	2.37	-0.437686	≥0.001	Vav1|vav 1 oncogene
15162	Hck	2.92	2.07	-0.496338	≥0.001	Hck|hemopoietic cell kinase
18707	Pik3cd	1.85	1.18	-0.648738	≥0.001	Pik3cd|phosphatidylinositol 3-kinase catalytic delta polypeptide
20963	Syk	0.68	0.3	-1.18057	≥0.001	Syk|spleen tyrosine kinase
68089	Arpc4	19.65	17.17	-0.194639	≥0.001	Arpc4|actin related protein 2/3 complex, subunit 4
18720	Pip5k1a	4.57	3.33	-0.456672	≥0.001	Pip5k1a|phosphatidylinositol-4-phosphate 5-kinase, type 1 alpha
17909	Myo10	3.41	2.15	-0.665435	≥0.001	Myo10|myosin X
234779	Plcg2	1.65	0.81	-1.02647	≥0.001	Plcg2|phospholipase C, gamma 2
13429	Dnm1	1.85	0.67	-1.46529	≥0.001	Dnm1|dynamin 1
18479	Pak1	1.36	0.3	-2.18057	≥0.001	Pak1|p21 (CDKN1A)-activated kinase 1
50784	Ppap2c	16.44	11.84	-0.473541	≥0.001	Ppap2c|phosphatidic acid phosphatase type 2C
94176	Dock2	0.68	0.01	-6.08746	≥0.001	Dock2|dedicator of cyto-kinesis 2
11845	Arf6	12.65	7.77	-0.703151	<0.001	Arf6|ADP-ribosylation factor 6
18708	Pik3r1	13.72	8.44	-0.700966	<0.001	Pik3r1|phosphatidylinositol 3-kinase, regulatory subunit, polypeptide 1 (p85 alpha)
110157	Raf1	34.44	24.21	-0.508482	<0.001	Raf1|v-raf-leukemia viral oncogene 1
14129	Fcgr1	2.72	0.22	-3.62803	<0.001	Fcgr1|Fc receptor, IgG, high affinity I
227753	Gsn	14.01	4.59	-1.60989	<0.001	Gsn|gelsolin
74192	Arpc5l	36.68	1.04	-5.14034	<0.001	Arpc5l|actin related protein 2/3 complex, subunit 5-like
EntrezID	Gene	N_TPM	DB_TPM	Log2 Ratio(DB/N)	FDR	Gene Description
Leukocyte transendothelial migration [PATH:mmu04670]
67268	2900073G15Rik	69.17	121.63	0.814281	<0.001	2900073G15Rik|RIKEN cDNA 2900073G15 gene
60595	Actn4	52.05	79.66	0.613957	<0.001	Actn4|actinin alpha 4
12388	Ctnnd1	5.84	15.4	1.39889	<0.001	Ctnnd1|catenin (cadherin associated protein), delta 1
18751	Prkcb	0.01	1.48	7.20945	<0.001	Prkcb|protein kinase C, beta
14083	Ptk2	5.06	10.81	1.09516	<0.001	Ptk2|PTK2 protein tyrosine kinase 2
22323	Vasp	2.82	7.11	1.33415	<0.001	Vasp|vasodilator-stimulated phosphoprotein
19229	Ptk2b	20.24	28.8	0.50886	<0.001	Ptk2b|PTK2 protein tyrosine kinase 2 beta
12385	Ctnna1	19.07	26.8	0.490928	<0.001	Ctnna1|catenin (cadherin associated protein), alpha 1
54354	Rassf5	1.26	3.18	1.3356	≥0.001	Rassf5|Ras association (RalGDS/AF-6) domain family member 5
14677	Gnai1	0.68	2.15	1.66073	≥0.001	Gnai1|guanine nucleotide binding protein (G protein), alpha inhibiting 1
18750	Prkca	1.07	2.59	1.27534	≥0.001	Prkca|protein kinase C, alpha
19354	Rac2	0.29	1.18	2.02466	≥0.001	Rac2|RAS-related C3 botulinum substrate 2
26416	Mapk14	11.38	14.58	0.35749	≥0.001	Mapk14|mitogen-activated protein kinase 14
60363	Cldn15	0.19	0.81	2.09192	≥0.001	Cldn15|claudin 15
83964	Jam3	0.01	0.37	5.20945	≥0.001	Jam3|junction adhesion molecule 3
74769	Pik3cb	6.23	7.77	0.318682	≥0.001	Pik3cb|phosphatidylinositol 3-kinase, catalytic, beta polypeptide
17972	Ncf4	0.68	1.26	0.889817	≥0.001	Ncf4|neutrophil cytosolic factor 4
18710	Pik3r3	0.01	0.22	4.45943	≥0.001	Pik3r3|phosphatidylinositol 3 kinase, regulatory subunit, polypeptide 3 (p55)
18706	Pik3ca	1.85	2.67	0.529314	≥0.001	Pik3ca|phosphatidylinositol 3-kinase, catalytic, alpha polypeptide
17698	Msn	6.52	7.92	0.280628	≥0.001	Msn|moesin
20469	Sipa1	3.89	4.89	0.330064	≥0.001	Sipa1|signal-induced proliferation associated gene 1
14678	Gnai2	26.56	28.8	0.116814	≥0.001	Gnai2|guanine nucleotide binding protein (G protein), alpha inhibiting 2
67374	Jam2	0.01	0.15	3.90689	≥0.001	Jam2|junction adhesion molecule 2
73934	4930412D23Rik	0.01	0.15	3.90689	≥0.001	4930412D23Rik|RIKEN cDNA 4930412D23 gene
30955	Pik3cg	0.01	0.15	3.90689	≥0.001	Pik3cg|phosphoinositide-3-kinase, catalytic, gamma polypeptide
22165	Txk	0.01	0.15	3.90689	≥0.001	Txk|TXK tyrosine kinase
69524	Esam	12.26	12.81	0.0633115	≥0.001	Esam|endothelial cell-specific adhesion molecule
17898	Myl7	0.29	0.37	0.351472	≥0.001	Myl7|myosin, light polypeptide 7, regulatory
18709	Pik3r2	4.86	5.03	0.0496021	≥0.001	Pik3r2|phosphatidylinositol 3-kinase, regulatory subunit, polypeptide 2 (p85 beta)
11461	Actb	0.19	0.22	0.211504	≥0.001	Actb|actin, beta
57257	Vav3	0.29	0.3	0.0489096	≥0.001	Vav3|vav 3 oncogene
17969	Ncf1	0.97	0.96	-0.0149503	≥0.001	Ncf1|neutrophil cytosolic factor 1
223864	Rapgef3	1.46	1.41	-0.0502732	≥0.001	Rapgef3|Rap guanine nucleotide exchange factor (GEF) 3
15894	Icam1	6.81	6.66	-0.0321326	≥0.001	Icam1|intercellular adhesion molecule 1
22330	Vcl	18	17.62	-0.030783	≥0.001	Vcl|vinculin
14679	Gnai3	16.15	15.77	-0.0343515	≥0.001	Gnai3|guanine nucleotide binding protein (G protein), alpha inhibiting 3
19353	Rac1	110.23	108.16	-0.0273499	≥0.001	Rac1|RAS-related C3 botulinum substrate 1
16456	F11r	6.91	6.29	-0.135626	≥0.001	F11r|F11 receptor
56508	Rapgef4	0.39	0.22	-0.825971	≥0.001	Rapgef4|Rap guanine nucleotide exchange factor (GEF) 4
320207	Pik3r5	2.24	1.78	-0.331621	≥0.001	Pik3r5|phosphoinositide-3-kinase, regulatory subunit 5, p101
20315	Cxcl12	143.89	139.32	-0.046564	≥0.001	Cxcl12|chemokine (C-X-C motif) ligand 12
232906	Grlf1	0.58	0.3	-0.95109	≥0.001	Grlf1|glucocorticoid receptor DNA binding factor 1
19878	Rock2	8.46	7.18	-0.236674	≥0.001	Rock2|Rho-associated coiled-coil containing protein kinase 2
12540	Cdc42	82.11	77.95	-0.0750089	≥0.001	Cdc42|cell division cycle 42 homolog (S. cerevisiae)
22324	Vav1	3.21	2.37	-0.437686	≥0.001	Vav1|vav 1 oncogene
16408	Itgal	1.36	0.81	-0.747613	≥0.001	Itgal|integrin alpha L
18707	Pik3cd	1.85	1.18	-0.648738	≥0.001	Pik3cd|phosphatidylinositol 3-kinase catalytic delta polypeptide
12562	Cdh5	13.72	11.7	-0.229772	≥0.001	Cdh5|cadherin 5
18260	Ocln	6.42	4.96	-0.372233	≥0.001	Ocln|occludin
13057	Cyba	11.38	9.4	-0.275768	≥0.001	Cyba|cytochrome b-245, alpha polypeptide
109711	Actn1	9.44	7.33	-0.364974	≥0.001	Actn1|actinin, alpha 1
22329	Vcam1	5.25	3.7	-0.504792	≥0.001	Vcam1|vascular cell adhesion molecule 1
17390	Mmp2	1.75	0.89	-0.975478	≥0.001	Mmp2|matrix metallopeptidase 2
234779	Plcg2	1.65	0.81	-1.02647	≥0.001	Plcg2|phospholipase C, gamma 2
17356	Mllt4	11.09	8.66	-0.35682	≥0.001	Mllt4|myeloid/lymphoid or mixed-lineage leukemia (trithorax homolog, Drosophila); translocated to, 4
19247	Ptpn11	5.74	3.85	-0.576192	≥0.001	Ptpn11|protein tyrosine phosphatase, non-receptor type 11
18613	Pecam1	6.52	4.37	-0.577239	≥0.001	Pecam1|platelet/endothelial cell adhesion molecule 1
13058	Cybb	9.34	6.37	-0.552129	≥0.001	Cybb|cytochrome b-245, beta polypeptide
12927	Bcar1	25.1	19.62	-0.355362	≥0.001	Bcar1|breast cancer anti-estrogen resistance 1
16409	Itgam	1.07	0.15	-2.83458	≥0.001	Itgam|integrin alpha M
26415	Mapk13	1.17	0.15	-2.96347	≥0.001	Mapk13|mitogen-activated protein kinase 13
16428	Itk	0.78	0.01	-6.2854	≥0.001	Itk|IL2-inducible T-cell kinase
19877	Rock1	8.37	4.59	-0.866733	≥0.001	Rock1|Rho-associated coiled-coil containing protein kinase 1
16414	Itgb2	4.67	1.92	-1.28232	<0.001	Itgb2|integrin beta 2
98932	Myl9	3.6	1.26	-1.51457	<0.001	Myl9|myosin, light polypeptide 9, regulatory
18708	Pik3r1	13.72	8.44	-0.700966	<0.001	Pik3r1|phosphatidylinositol 3-kinase, regulatory subunit, polypeptide 1 (p85 alpha)
19094	Mapk11	1.75	0.22	-2.99178	<0.001	Mapk11|mitogen-activated protein kinase 11
16401	Itga4	4.67	1.41	-1.72773	<0.001	Itga4|integrin alpha 4
12739	Cldn3	29.58	19.17	-0.625772	<0.001	Cldn3|claudin 3
19303	Pxn	22.67	12.96	-0.806719	<0.001	Pxn|paxillin
29857	Mapk12	40.28	26.13	-0.624357	<0.001	Mapk12|mitogen-activated protein kinase 12
16412	Itgb1	38.72	24.43	-0.664425	<0.001	Itgb1|integrin beta 1 (fibronectin receptor beta)
12738	Cldn2	322.52	273.91	-0.235687	<0.001	Cldn2|claudin 2
12741	Cldn5	7.59	1.18	-2.68531	<0.001	Cldn5|claudin 5
12387	Ctnnb1	161.99	106.75	-0.601669	<0.001	Ctnnb1|catenin (cadherin associated protein), beta 1
12737	Cldn1	232.72	45.97	-2.33983	<0.001	Cldn1|claudin 1
EntrezID	Gene	N_TPM	DB_TPM	Log2 Ratio(DB/N)	FDR	Gene Description
Intestinal immune network for IgA production [PATH:mmu04672]
18703	Pigr	65.57	157.24	1.26186	<0.001	Pigr|polymeric immunoglobulin receptor
16169	Il15ra	11.77	28.95	1.29845	<0.001	Il15ra|interleukin 15 receptor, alpha chain
14969	H2-Eb1	22.67	43.9	0.953437	<0.001	H2-Eb1|histocompatibility 2, class II antigen E beta
17000	Ltbr	14.01	29.76	1.08692	<0.001	Ltbr|lymphotoxin B receptor
14961	H2-Ab1	54.39	80.03	0.557199	<0.001	H2-Ab1|histocompatibility 2, class II antigen A, beta 1
20300	Ccl25	1.95	4.89	1.32636	<0.001	Ccl25|chemokine (C-C motif) ligand 25
16168	Il15	0.97	3.18	1.71297	<0.001	Il15|interleukin 15
14960	H2-Aa	55.94	65.96	0.237711	≥0.001	H2-Aa|histocompatibility 2, class II antigen A, alpha
12769	Ccr9	0.29	1.26	2.1193	≥0.001	Ccr9|chemokine (C-C motif) receptor 9
24099	Tnfsf13b	0.01	0.44	5.45943	≥0.001	Tnfsf13b|tumor necrosis factor (ligand) superfamily, member 13b
15000	H2-DMb2	0.01	0.3	4.90689	≥0.001	H2-DMb2|histocompatibility 2, class II, locus Mb2
56838	Ccl28	0.01	0.3	4.90689	≥0.001	Ccl28|chemokine (C-C motif) ligand 28
72049	Tnfrsf13c	0.01	0.22	4.45943	≥0.001	Tnfrsf13c|tumor necrosis factor receptor superfamily, member 13c
12777	Ccr10	0.01	0.15	3.90689	≥0.001	Ccr10|chemokine (C-C motif) receptor 10
20301	Ccl27a	3.21	3.92	0.28828	≥0.001	Ccl27a|chemokine (C-C motif) ligand 27A
53859	Map3k14	0.58	0.67	0.208108	≥0.001	Map3k14|mitogen-activated protein kinase kinase kinase 14
15001	H2-Oa	0.29	0.15	-0.95109	≥0.001	H2-Oa|histocompatibility 2, O region alpha locus
20315	Cxcl12	143.89	139.32	-0.046564	≥0.001	Cxcl12|chemokine (C-X-C motif) ligand 12
50723	Icosl	0.88	0.44	-1	≥0.001	Icosl|icos ligand
15002	H2-Ob	0.29	0.01	-4.85798	≥0.001	H2-Ob|histocompatibility 2, O region beta locus
12524	Cd86	1.36	0.59	-1.20482	≥0.001	Cd86|CD86 antigen
14999	H2-DMb1	7.3	5.11	-0.514573	≥0.001	H2-DMb1|histocompatibility 2, class II, locus Mb1
21803	Tgfb1	5.16	3.18	-0.698344	≥0.001	Tgfb1|transforming growth factor, beta 1
21939	Cd40	1.07	0.15	-2.83458	≥0.001	Cd40|CD40 antigen
21947	Cd40lg	0.68	0.01	-6.08746	≥0.001	Cd40lg|CD40 ligand
16421	Itgb7	1.46	0.15	-3.28293	<0.001	Itgb7|integrin beta 7
16401	Itga4	4.67	1.41	-1.72773	<0.001	Itga4|integrin alpha 4
EntrezID	Gene	N_TPM	DB_TPM	Log2 Ratio(DB/N)	FDR	Gene Description
Chemokine signaling pathway [PATH:mmu04062]
12675	Chuk	28.7	63.96	1.15612	<0.001	Chuk|conserved helix-loop-helix ubiquitous kinase
606496	Gsk3a	27.63	52.93	0.93785	<0.001	Gsk3a|glycogen synthase kinase 3 alpha
14699	Gngt1	0.88	8.14	3.20945	<0.001	Gngt1|guanine nucleotide binding protein (G protein), gamma transducing activity polypeptide 1
18749	Prkacb	8.27	22.43	1.43947	<0.001	Prkacb|protein kinase, cAMP dependent, catalytic, beta
26417	Mapk3	19.46	37.24	0.936341	<0.001	Mapk3|mitogen-activated protein kinase 3
18747	Prkaca	25.1	44.05	0.811455	<0.001	Prkaca|protein kinase, cAMP dependent, catalytic, alpha
26395	Map2k1	11.58	23.91	1.04598	<0.001	Map2k1|mitogen-activated protein kinase kinase 1
18751	Prkcb	0.01	1.48	7.20945	<0.001	Prkcb|protein kinase C, beta
14693	Gnb2	47.19	64.7	0.455285	<0.001	Gnb2|guanine nucleotide binding protein (G protein), beta 2
11512	Adcy6	7.78	15.62	1.00555	<0.001	Adcy6|adenylate cyclase 6
56744	Pf4	0.19	2.15	3.50027	<0.001	Pf4|platelet factor 4
14083	Ptk2	5.06	10.81	1.09516	<0.001	Ptk2|PTK2 protein tyrosine kinase 2
14701	Gng12	23.35	34.35	0.556888	<0.001	Gng12|guanine nucleotide binding protein (G protein), gamma 12
12928	Crk	6.03	11.7	0.956279	<0.001	Crk|v-crk sarcoma virus CT10 oncogene homolog (avian)
14772	Grk4	1.07	3.92	1.87324	<0.001	Grk4|G protein-coupled receptor kinase 4
18035	Nfkbia	1.85	5.18	1.48543	<0.001	Nfkbia|nuclear factor of kappa light polypeptide gene enhancer in B-cells inhibitor, alpha
19229	Ptk2b	20.24	28.8	0.50886	<0.001	Ptk2b|PTK2 protein tyrosine kinase 2 beta
16151	Ikbkg	7.98	13.4	0.747772	<0.001	Ikbkg|inhibitor of kappaB kinase gamma
20300	Ccl25	1.95	4.89	1.32636	<0.001	Ccl25|chemokine (C-C motif) ligand 25
24001	Tiam2	4.77	8.74	0.873644	<0.001	Tiam2|T-cell lymphoma invasion and metastasis 2
26413	Mapk1	12.65	18.06	0.513661	≥0.001	Mapk1|mitogen-activated protein kinase 1
18176	Nras	7	10.81	0.62694	≥0.001	Nras|neuroblastoma ras oncogene
14677	Gnai1	0.68	2.15	1.66073	≥0.001	Gnai1|guanine nucleotide binding protein (G protein), alpha inhibiting 1
140580	Elmo1	0.19	1.18	2.63472	≥0.001	Elmo1|engulfment and cell motility 1, ced-12 homolog (C. elegans)
277360	Prex1	0.68	2	1.55639	≥0.001	Prex1|phosphatidylinositol-3,4,5-trisphosphate-dependent Rac exchange factor 1
12769	Ccr9	0.29	1.26	2.1193	≥0.001	Ccr9|chemokine (C-C motif) receptor 9
18796	Plcb2	1.17	2.67	1.19033	≥0.001	Plcb2|phospholipase C, beta 2
19354	Rac2	0.29	1.18	2.02466	≥0.001	Rac2|RAS-related C3 botulinum substrate 2
80901	Cxcr6	0.01	0.52	5.70044	≥0.001	Cxcr6|chemokine (C-X-C motif) receptor 6
20308	Ccl9	1.26	2.59	1.03953	≥0.001	Ccl9|chemokine (C-C motif) ligand 9
20312	Cx3cl1	0.29	0.96	1.72698	≥0.001	Cx3cl1|chemokine (C-X3-C motif) ligand 1
20303	Ccl4	0.01	0.37	5.20945	≥0.001	Ccl4|chemokine (C-C motif) ligand 4
14697	Gnb5	0.01	0.37	5.20945	≥0.001	Gnb5|guanine nucleotide binding protein (G protein), beta 5
18753	Prkcd	6.62	8.74	0.400802	≥0.001	Prkcd|protein kinase C, delta
17329	Cxcl9	1.17	2.15	0.877828	≥0.001	Cxcl9|chemokine (C-X-C motif) ligand 9
12772	Ccr2	0.29	0.81	1.48187	≥0.001	Ccr2|chemokine (C-C motif) receptor 2
56838	Ccl28	0.01	0.3	4.90689	≥0.001	Ccl28|chemokine (C-C motif) ligand 28
14710	Gngt2	20.24	23.25	0.200021	≥0.001	Gngt2|guanine nucleotide binding protein (G protein), gamma transducing activity polypeptide 2
74769	Pik3cb	6.23	7.77	0.318682	≥0.001	Pik3cb|phosphatidylinositol 3-kinase, catalytic, beta polypeptide
57266	Cxcl14	0.01	0.22	4.45943	≥0.001	Cxcl14|chemokine (C-X-C motif) ligand 14
20302	Ccl3	0.01	0.22	4.45943	≥0.001	Ccl3|chemokine (C-C motif) ligand 3
12773	Ccr4	0.01	0.22	4.45943	≥0.001	Ccr4|chemokine (C-C motif) receptor 4
216148	Shc2	0.01	0.22	4.45943	≥0.001	Shc2|src homology 2 domain-containing transforming protein C2
20662	Sos1	0.01	0.22	4.45943	≥0.001	Sos1|Son of sevenless homolog 1 (Drosophila)
18710	Pik3r3	0.01	0.22	4.45943	≥0.001	Pik3r3|phosphatidylinositol 3 kinase, regulatory subunit, polypeptide 3 (p55)
14708	Gng7	0.01	0.22	4.45943	≥0.001	Gng7|guanine nucleotide binding protein (G protein), gamma 7
436049	Gm5741	0.01	0.22	4.45943	≥0.001	EG436049|predicted gene, EG436049
18706	Pik3ca	1.85	2.67	0.529314	≥0.001	Pik3ca|phosphatidylinositol 3-kinase, catalytic, alpha polypeptide
14702	Gng2	0.78	1.33	0.76988	≥0.001	Gng2|guanine nucleotide binding protein (G protein), gamma 2
73178	Wasl	9.34	10.96	0.230753	≥0.001	Wasl|Wiskott-Aldrich syndrome-like (human)
19108	Prkx	9.73	11.33	0.219636	≥0.001	Prkx|protein kinase, X-linked
15461	Hras1	0.19	0.52	1.45251	≥0.001	Hras1|Harvey rat sarcoma virus oncogene 1
216869	Arrb2	6.23	7.48	0.263806	≥0.001	Arrb2|arrestin, beta 2
20663	Sos2	2.92	3.78	0.372418	≥0.001	Sos2|Son of sevenless homolog 2 (Drosophila)
14678	Gnai2	26.56	28.8	0.116814	≥0.001	Gnai2|guanine nucleotide binding protein (G protein), alpha inhibiting 2
57349	Ppbp	0.01	0.15	3.90689	≥0.001	Ppbp|pro-platelet basic protein
20306	Ccl7	0.01	0.15	3.90689	≥0.001	Ccl7|chemokine (C-C motif) ligand 7
12777	Ccr10	0.01	0.15	3.90689	≥0.001	Ccr10|chemokine (C-C motif) receptor 10
14191	Fgr	0.01	0.15	3.90689	≥0.001	Fgr|Gardner-Rasheed feline sarcoma viral (Fgr) oncogene homolog
30955	Pik3cg	0.01	0.15	3.90689	≥0.001	Pik3cg|phosphoinositide-3-kinase, catalytic, gamma polypeptide
56484	Foxo3	0.01	0.15	3.90689	≥0.001	Foxo3|forkhead box O3
22376	Was	0.01	0.15	3.90689	≥0.001	Was|Wiskott-Aldrich syndrome homolog (human)
20301	Ccl27a	3.21	3.92	0.28828	≥0.001	Ccl27a|chemokine (C-C motif) ligand 27A
23797	Akt3	0.39	0.67	0.780687	≥0.001	Akt3|thymoma viral proto-oncogene 3
56221	Ccl24	0.19	0.37	0.961526	≥0.001	Ccl24|chemokine (C-C motif) ligand 24
11515	Adcy9	1.95	2.29	0.231873	≥0.001	Adcy9|adenylate cyclase 9
66066	Gng11	5.93	6.22	0.0688825	≥0.001	Gng11|guanine nucleotide binding protein (G protein), gamma 11
16963	Xcl1	0.29	0.37	0.351472	≥0.001	Xcl1|chemokine (C motif) ligand 1
18797	Plcb3	7.39	7.62	0.0442166	≥0.001	Plcb3|phospholipase C, beta 3
18709	Pik3r2	4.86	5.03	0.0496021	≥0.001	Pik3r2|phosphatidylinositol 3-kinase, regulatory subunit, polypeptide 2 (p85 beta)
18762	Prkcz	3.02	3.11	0.042366	≥0.001	Prkcz|protein kinase C, zeta
20847	Stat2	5.35	5.4	0.0134205	≥0.001	Stat2|signal transducer and activator of transcription 2
109689	Arrb1	2.04	2.07	0.0210616	≥0.001	Arrb1|arrestin, beta 1
57257	Vav3	0.29	0.3	0.0489096	≥0.001	Vav3|vav 3 oncogene
17969	Ncf1	0.97	0.96	-0.0149503	≥0.001	Ncf1|neutrophil cytosolic factor 1
14784	Grb2	34.73	34.5	-0.00958605	≥0.001	Grb2|growth factor receptor bound protein 2
16653	Kras	21.6	21.17	-0.02901	≥0.001	Kras|v-Ki-ras2 Kirsten rat sarcoma viral oncogene homolog
14679	Gnai3	16.15	15.77	-0.0343515	≥0.001	Gnai3|guanine nucleotide binding protein (G protein), alpha inhibiting 3
20846	Stat1	0.19	0.15	-0.341037	≥0.001	Stat1|signal transducer and activator of transcription 1
12766	Cxcr3	0.29	0.22	-0.398549	≥0.001	Cxcr3|chemokine (C-X-C motif) receptor 3
109880	Braf	5.35	4.96	-0.109199	≥0.001	Braf|Braf transforming gene
20304	Ccl5	1.56	1.33	-0.23012	≥0.001	Ccl5|chemokine (C-C motif) ligand 5
19353	Rac1	110.23	108.16	-0.0273499	≥0.001	Rac1|RAS-related C3 botulinum substrate 1
11513	Adcy7	0.58	0.44	-0.398549	≥0.001	Adcy7|adenylate cyclase 7
26385	Grk6	2.53	2.22	-0.188578	≥0.001	Grk6|G protein-coupled receptor kinase 6
20296	Ccl2	3.41	3.04	-0.1657	≥0.001	Ccl2|chemokine (C-C motif) ligand 2
20779	Src	1.75	1.48	-0.241758	≥0.001	Src|Rous sarcoma oncogene
12929	Crkl	0.39	0.22	-0.825971	≥0.001	Crkl|v-crk sarcoma virus CT10 oncogene homolog (avian)-like
320207	Pik3r5	2.24	1.78	-0.331621	≥0.001	Pik3r5|phosphoinositide-3-kinase, regulatory subunit 5, p101
16150	Ikbkb	0.88	0.59	-0.576789	≥0.001	Ikbkb|inhibitor of kappaB kinase beta
20315	Cxcl12	143.89	139.32	-0.046564	≥0.001	Cxcl12|chemokine (C-X-C motif) ligand 12
14688	Gnb1	9.34	8.22	-0.184284	≥0.001	Gnb1|guanine nucleotide binding protein (G protein), beta 1
19878	Rock2	8.46	7.18	-0.236674	≥0.001	Rock2|Rho-associated coiled-coil containing protein kinase 2
12540	Cdc42	82.11	77.95	-0.0750089	≥0.001	Cdc42|cell division cycle 42 homolog (S. cerevisiae)
22324	Vav1	3.21	2.37	-0.437686	≥0.001	Vav1|vav 1 oncogene
15162	Hck	2.92	2.07	-0.496338	≥0.001	Hck|hemopoietic cell kinase
18707	Pik3cd	1.85	1.18	-0.648738	≥0.001	Pik3cd|phosphatidylinositol 3-kinase catalytic delta polypeptide
20310	Cxcl2	0.19	0.01	-4.24793	≥0.001	Cxcl2|chemokine (C-X-C motif) ligand 2
12775	Ccr7	0.19	0.01	-4.24793	≥0.001	Ccr7|chemokine (C-C motif) receptor 7
55985	Cxcl13	2.04	1.26	-0.695145	≥0.001	Cxcl13|chemokine (C-X-C motif) ligand 13
93742	Pard3	39.5	34.42	-0.198606	≥0.001	Pard3|par-3 (partitioning defective 3) homolog (C. elegans)
210044	Adcy2	0.39	0.01	-5.2854	≥0.001	Adcy2|adenylate cyclase 2
20305	Ccl6	6.81	4.59	-0.569161	≥0.001	Ccl6|chemokine (C-C motif) ligand 6
110355	Adrbk1	8.08	5.63	-0.52122	≥0.001	Adrbk1|adrenergic receptor kinase, beta 1
14825	Cxcl1	2.43	1.11	-1.1304	≥0.001	Cxcl1|chemokine (C-X-C motif) ligand 1
271849	Shc4	0.49	0.01	-5.61471	≥0.001	Shc4|SHC (Src homology 2 domain containing) family, member 4
16452	Jak2	15.86	11.99	-0.403561	≥0.001	Jak2|Janus kinase 2
18033	Nfkb1	13.91	10.07	-0.466059	≥0.001	Nfkb1|nuclear factor of kappa light polypeptide gene enhancer in B-cells 1, p105
14773	Grk5	2.63	1.11	-1.2445	≥0.001	Grk5|G protein-coupled receptor kinase 5
12927	Bcar1	25.1	19.62	-0.355362	≥0.001	Bcar1|breast cancer anti-estrogen resistance 1
18479	Pak1	1.36	0.3	-2.18057	≥0.001	Pak1|p21 (CDKN1A)-activated kinase 1
14700	Gng10	5.25	2.81	-0.901747	≥0.001	Gng10|guanine nucleotide binding protein (G protein), gamma 10
20299	Ccl22	0.68	0.01	-6.08746	≥0.001	Ccl22|chemokine (C-C motif) ligand 22
94176	Dock2	0.68	0.01	-6.08746	≥0.001	Dock2|dedicator of cyto-kinesis 2
20848	Stat3	49.42	40.72	-0.279357	≥0.001	Stat3|signal transducer and activator of transcription 3
16428	Itk	0.78	0.01	-6.2854	≥0.001	Itk|IL2-inducible T-cell kinase
21844	Tiam1	1.26	0.15	-3.07039	≥0.001	Tiam1|T-cell lymphoma invasion and metastasis 1
56637	Gsk3b	15.57	10.51	-0.567006	≥0.001	Gsk3b|glycogen synthase kinase 3 beta
19877	Rock1	8.37	4.59	-0.866733	≥0.001	Rock1|Rho-associated coiled-coil containing protein kinase 1
18708	Pik3r1	13.72	8.44	-0.700966	<0.001	Pik3r1|phosphatidylinositol 3-kinase, regulatory subunit, polypeptide 1 (p85 alpha)
20851	Stat5b	24.81	16.73	-0.568484	<0.001	Stat5b|signal transducer and activator of transcription 5B
19697	Rela	21.89	14.14	-0.63049	<0.001	Rela|v-rel reticuloendotheliosis viral oncogene homolog A (avian)
110157	Raf1	34.44	24.21	-0.508482	<0.001	Raf1|v-raf-leukemia viral oncogene 1
65956	Ccl21c	6.81	2.52	-1.43423	<0.001	Ccl21c|chemokine (C-C motif) ligand 21C (leucine)
12774	Ccr5	3.5	0.74	-2.24176	<0.001	Ccr5|chemokine (C-C motif) receptor 5
19303	Pxn	22.67	12.96	-0.806719	<0.001	Pxn|paxillin
66102	Cxcl16	22.28	12.66	-0.815472	<0.001	Cxcl16|chemokine (C-X-C motif) ligand 16
104110	Adcy4	9.15	3.48	-1.39468	<0.001	Adcy4|adenylate cyclase 4
